# Supplementary material for: Rapid crustal transit of magma drives magmatic rifting in Ethiopia
Source: Research Square preprint supplement (doi:10.21203/rs.3.rs-5459781/v1), 2025-03-19
Supplement: Supplementary file 1 [file 5a6637f809264d52c7c2e0c8.pdf]

## **Supplementary information for: ‘Rapid crustal transit of magma drives magmatic rifting in Ethiopia’**

Kevin Wong<sup>1,2,\*</sup>, Daniel Morgan<sup>1</sup>, David Ferguson<sup>1</sup>, Marie Edmonds<sup>3</sup>, Amdemichael Zafu Tadesse<sup>4,5</sup>, Maeve Murphy Quinlan<sup>1</sup>, Gezahegn Yirgu<sup>5</sup>, and Tim Wright<sup>1</sup>

<sup>1</sup>Centre for the Observation and Modelling of Earthquakes, Volcanoes and Tectonics (COMET), School of Earth and Environment, University of Leeds, Leeds LS2 9JT, United Kingdom

<sup>2</sup>Dipartimento di Scienze Biologiche, Geologiche e Ambientali (BiGeA), Alma Mater Studiorum Università di Bologna, Piazza di Porta San Donato 1, 40126 Bologna, Italy

<sup>3</sup>Centre for the Observation and Modelling of Earthquakes, Volcanoes and Tectonics (COMET), Department of Earth Sciences, University of Cambridge, Cambridge CB2 3EQ, United Kingdom

<sup>4</sup>Department of Earth Sciences, University of Oxford, Oxford OX1 3AN, United Kingdom

<sup>5</sup>School of Earth Sciences, Addis Ababa University, P. O. Box 1176 Addis Ababa, Ethiopia

\*corresponding author: [kevin.wong@unibo.it](mailto:kevin.wong@unibo.it)

This supplementary file includes the following:

**Table S1**

**Figures S1–S31**

**References for figure captions**

*Table S1. Primitive basalt compositions from the Boku Volcanic Complex and East Ziway cone fields used in Petrolog3 (NB-01 and Z67) and RhyoliteMELTS 1.2.0 (Z58) modelling. Note that Z58 and Z67, both collected from the Ziway cone field, represent the melt in which our olivines are obtained and the most primitive melt sampled within Ziway respectively. Z67 is chosen in lieu of Z58 for Petrolog modelling to allow for a greater range of crystallising olivine Fo.*

| <b>Oxide (wt.%)</b>            | <b>Boku (NB-01)</b> | <b>Ziway (Z58)</b> | <b>Ziway (Z67)</b> |
|--------------------------------|---------------------|--------------------|--------------------|
| SiO <sub>2</sub>               | 45.43               | 47.75              | 44.98              |
| TiO <sub>2</sub>               | 2.19                | 2.17               | 2.19               |
| Al <sub>2</sub> O <sub>3</sub> | 16.81               | 14.54              | 13.76              |
| Fe <sub>2</sub> O <sub>3</sub> | 12.74               | 12.16              | 12.43              |
| MnO                            | 0.16                | 0.19               | 0.20               |
| MgO                            | 8.81                | 7.39               | 9.24               |
| CaO                            | 10.52               | 9.09               | 10.49              |
| Na <sub>2</sub> O              | 2.52                | 2.95               | 2.41               |
| K <sub>2</sub> O               | 0.46                | 1.04               | 0.56               |
| P <sub>2</sub> O <sub>5</sub>  | 0.33                | 0.54               | 0.30               |
| Cr <sub>2</sub> O <sub>3</sub> | 0.00                | 0.05               | 0.07               |
| H <sub>2</sub> O               | 1.00                | Variable (Fig. S2) | 1.00               |

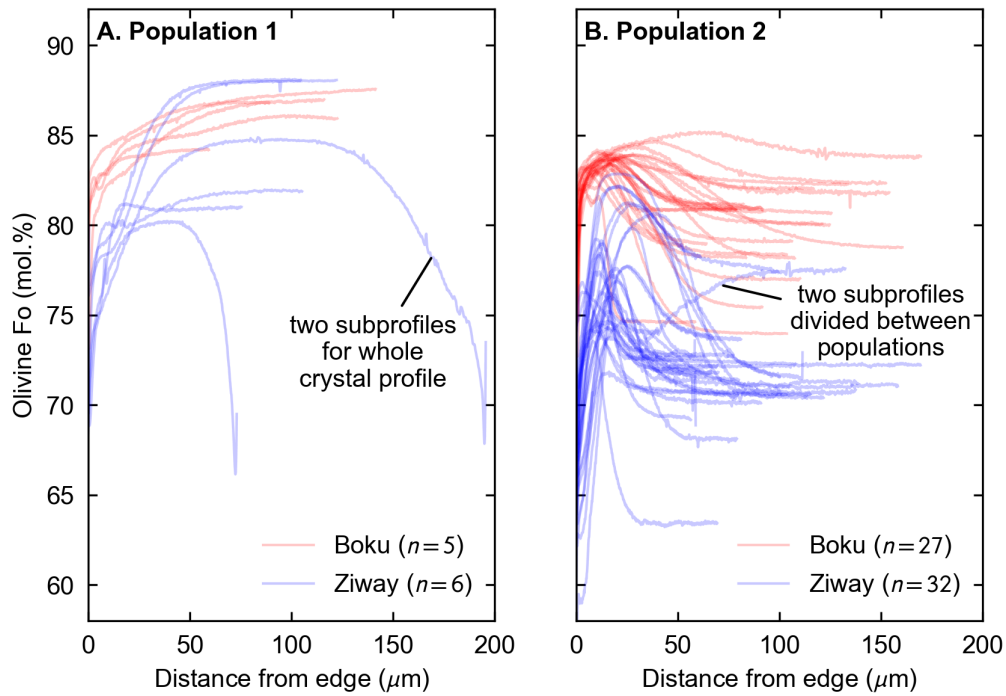

*Figure S1. Collated plots of olivine profiles from Boku and Ziway. We highlight two distinct profiles from each population: A. A cross-crystal profile of sample ZB\_A5 from Ziway is divided into two subprofiles for Autodiff modelling. B. Sample ZB\_D6 possesses a normal-zoned interior and a reverse-zoned exterior. For the purposes of this study, this profile is divided into two sub-profiles which are divided accordingly between the two populations.*

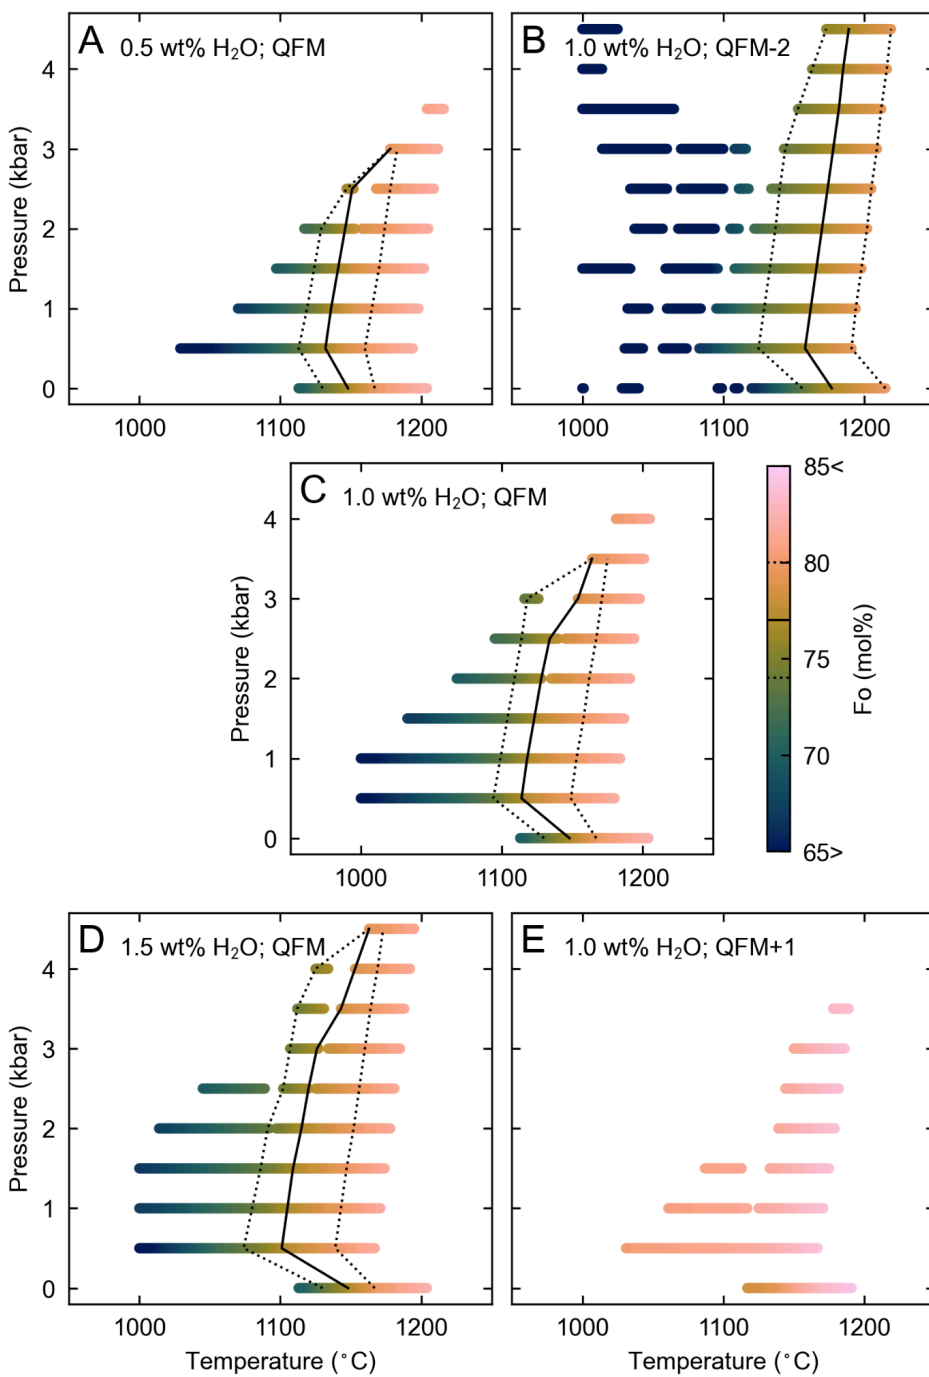

Figure S2: Rhyolite-MELTS v1.2.0 models <sup>1</sup> for composition Z58 from East Ziwai (Table S1). The solid black line marks  $Fo_{77}$ , the median rim composition of Ziwai reverse-zoned olivines; the dotted black lines mark  $1\sigma$  of  $\pm 3$  mol%  $Fo$ . Models are run at pressure intervals of 0.5 kbar up to a maximum pressure of 4.5 kbar <sup>2</sup>. Initial melt  $H_2O$  contents <sup>2,3</sup> and oxygen fugacity conditions <sup>4,5</sup> for each model are provided as annotations within each subfigure.

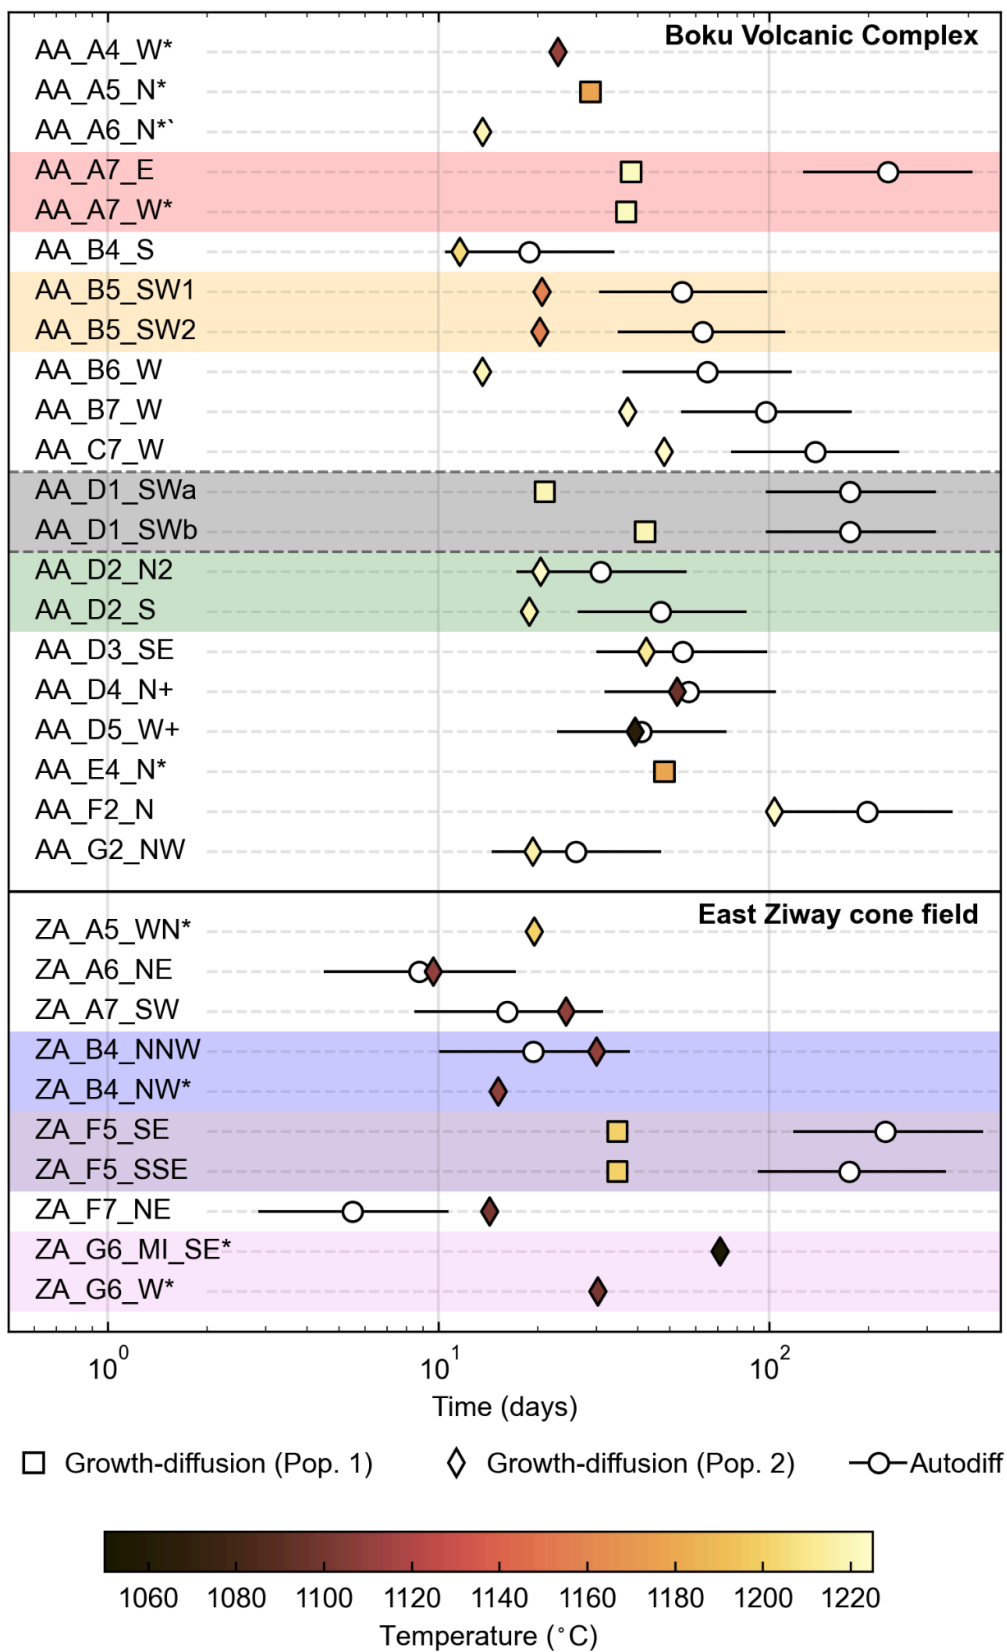

*Figure S3. All olivine Fe-Mg interdiffusion profile timescales recorded by the growth-diffusion model for both localities. Corresponding Autodiff results with  $1\sigma$  uncertainties are shown on the same level as each growth-diffusion timescale. Profile labels with an asterisk (\*) are growth-diffusion timescales without a corresponding Autodiff timescale; those with a plus symbol (+) have a stepped starting condition (see Supplementary Figures 29). Paired profiles, highlighted with the same background colour, are recorded from the same crystal, and should therefore return self-similar timescales. The paired profiles bracketed by dashed lines (AA\_D1\_SWa and AA\_D1\_SWb) are two models with different conditions which match the profile with a similar degree of fitness. Growth-diffusion timescale markers (square for normal-zoned Population 1; diamond for reverse-zoned Population 2), are coloured by the magmatic temperature which best replicates the observed profile shape.*

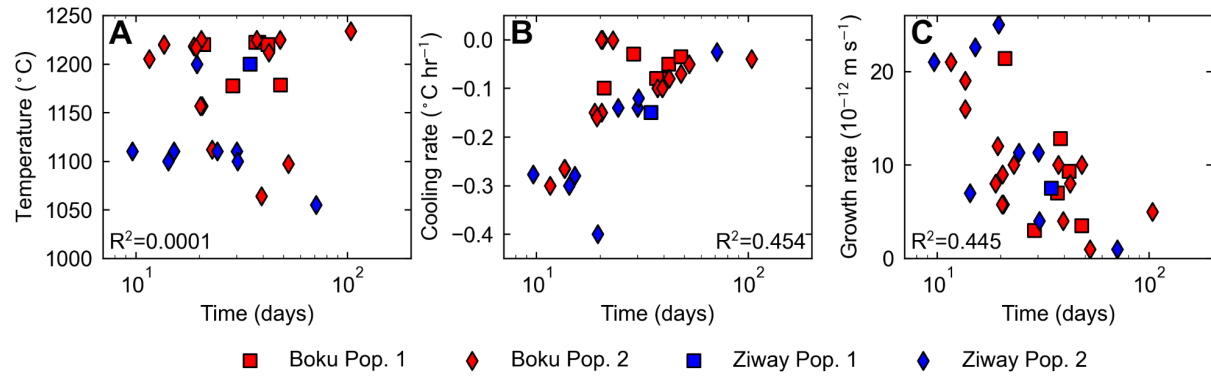

*Figure S4: Main Ethiopian Rift olivine timescales from growth-diffusion modelling plotted against growth-diffusion parameters. Population 1 olivines are shown as the square markers; Population 2 olivines are shown as diamonds; Boku and Ziway olivines are red and blue respectively.*

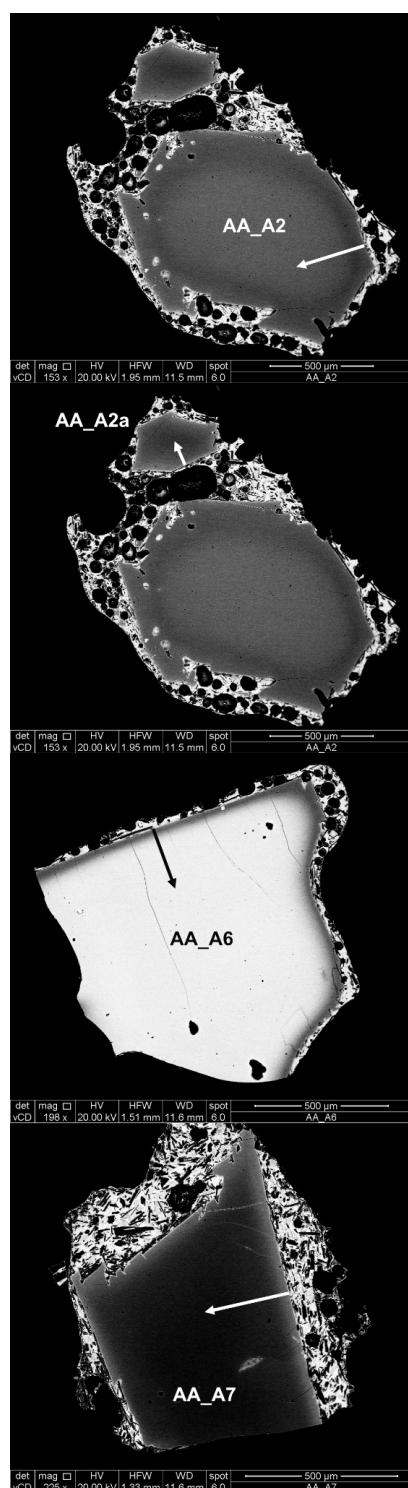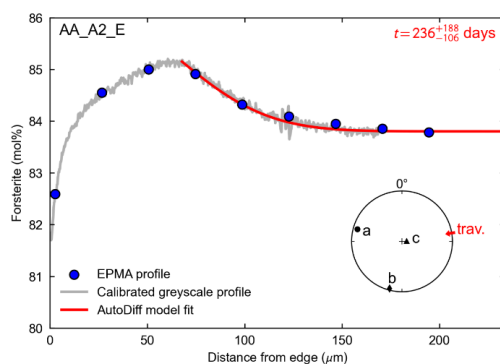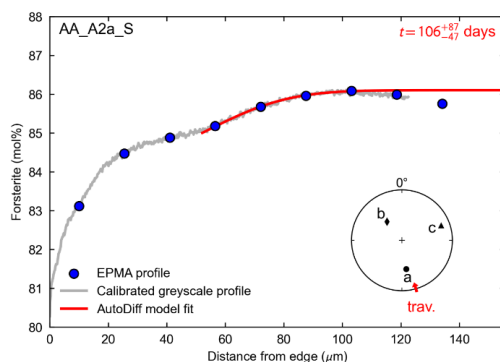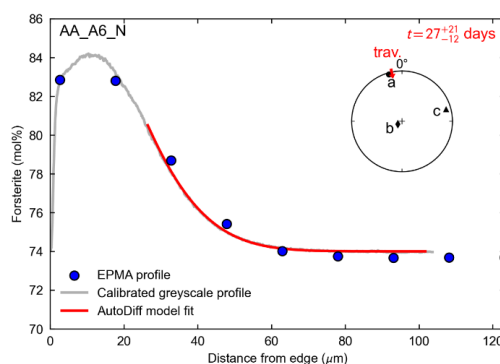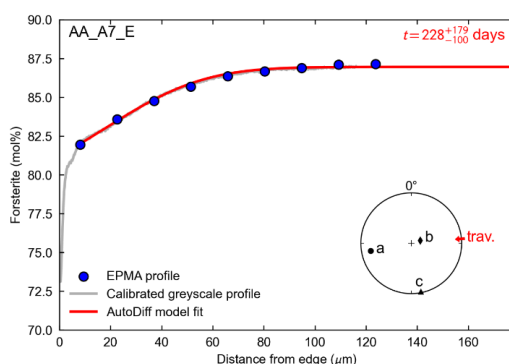

Figures S5–S22: Backscatter electron images showing profile traverses across Main Ethiopian Rift olivines, and plots showing Fo change with traverse distance across profiles. Autodiff model fits are shown as the red line. Pole figures showing crystallographic orientation are shown as inset figures.

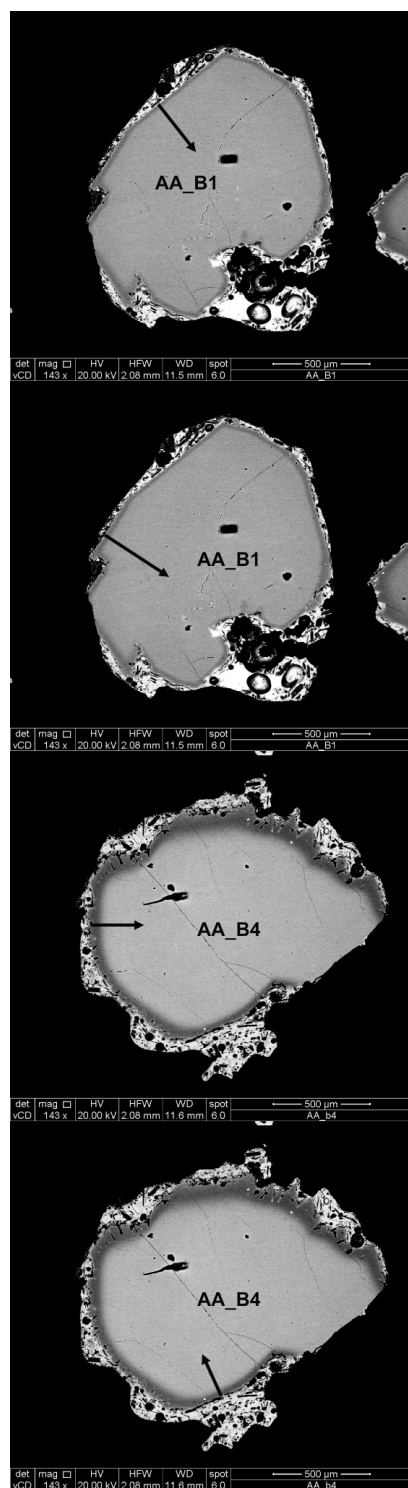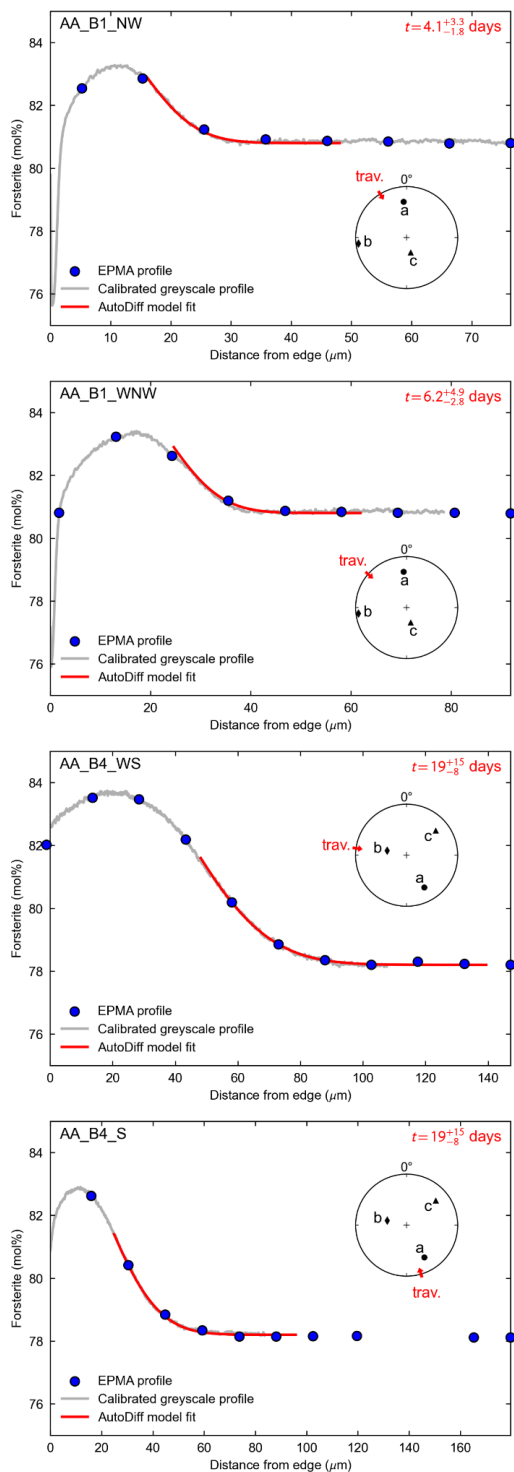

Figure S6.

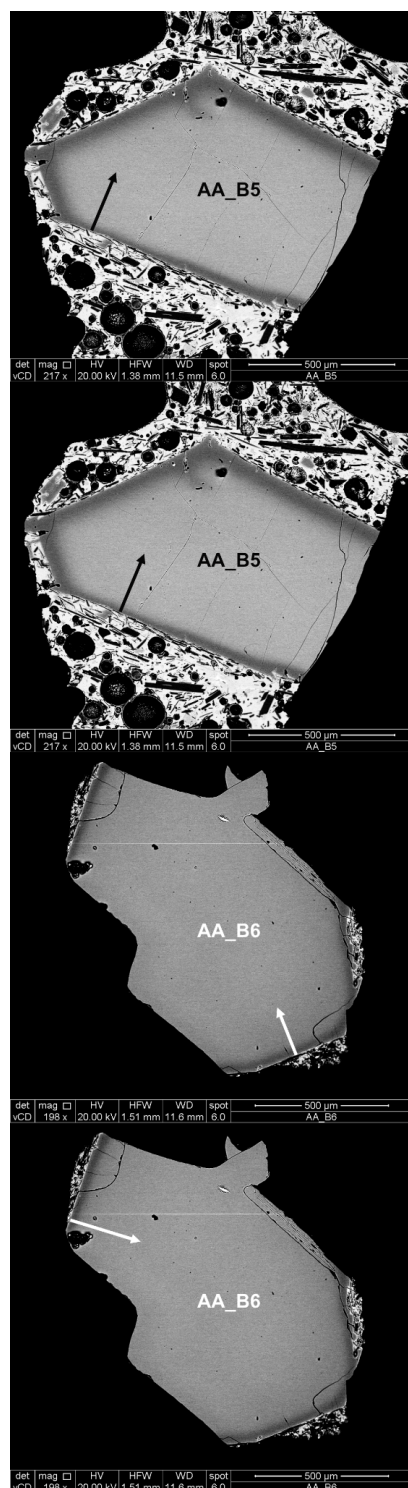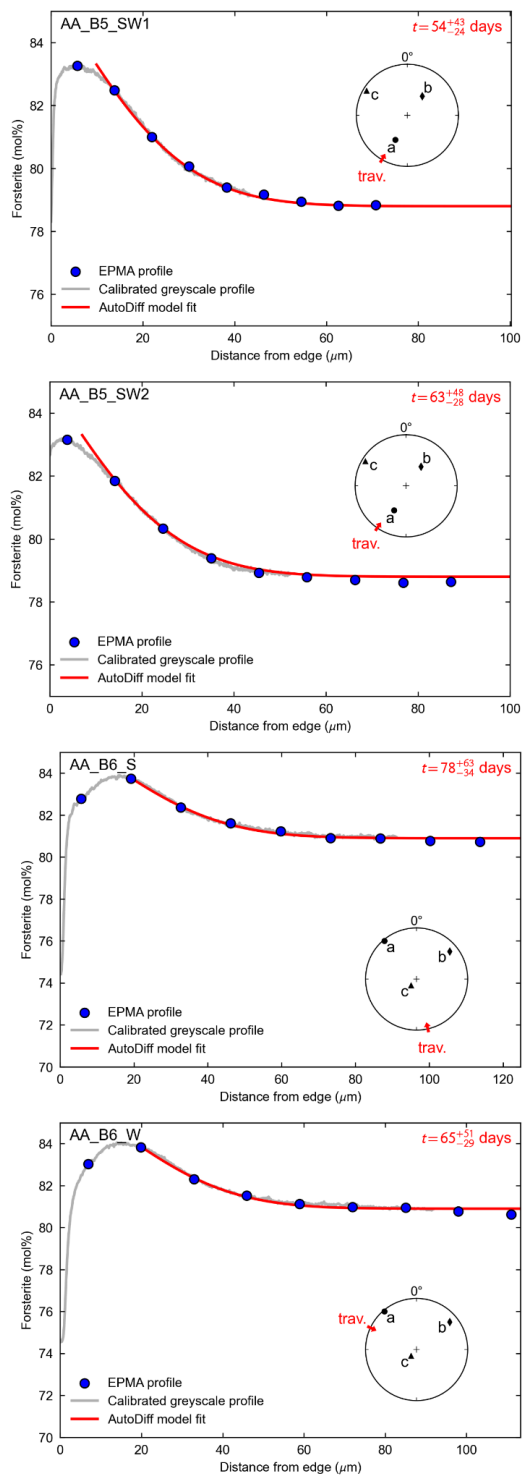

Figure S7.

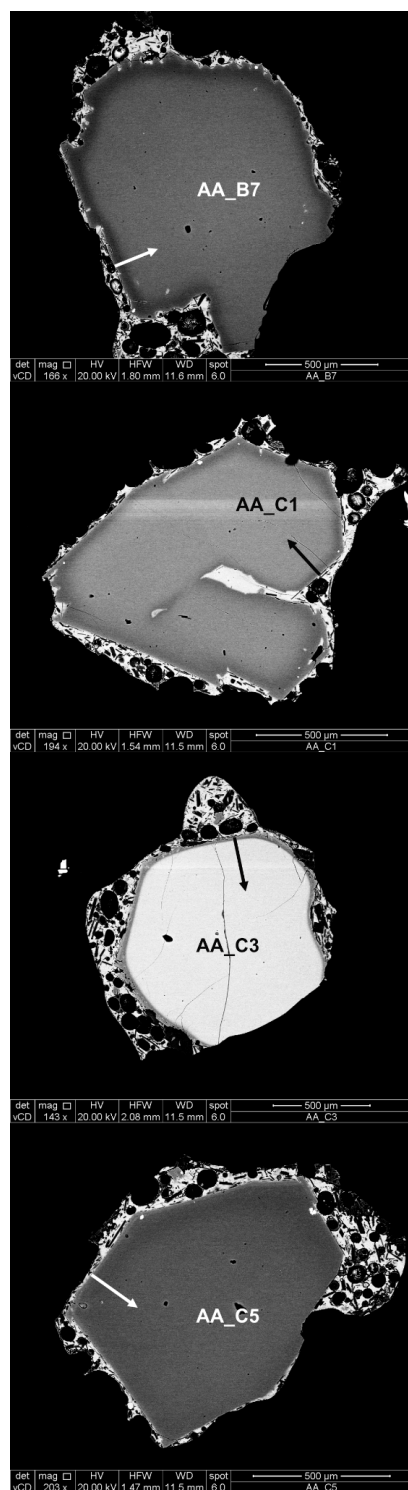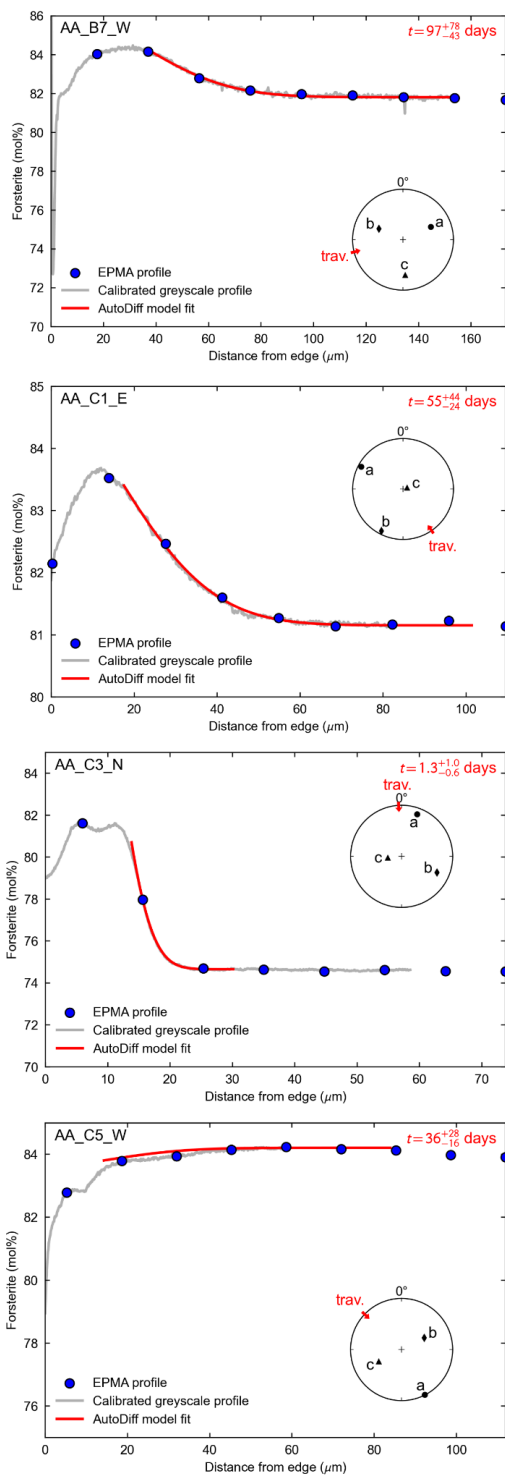

Figure S8.

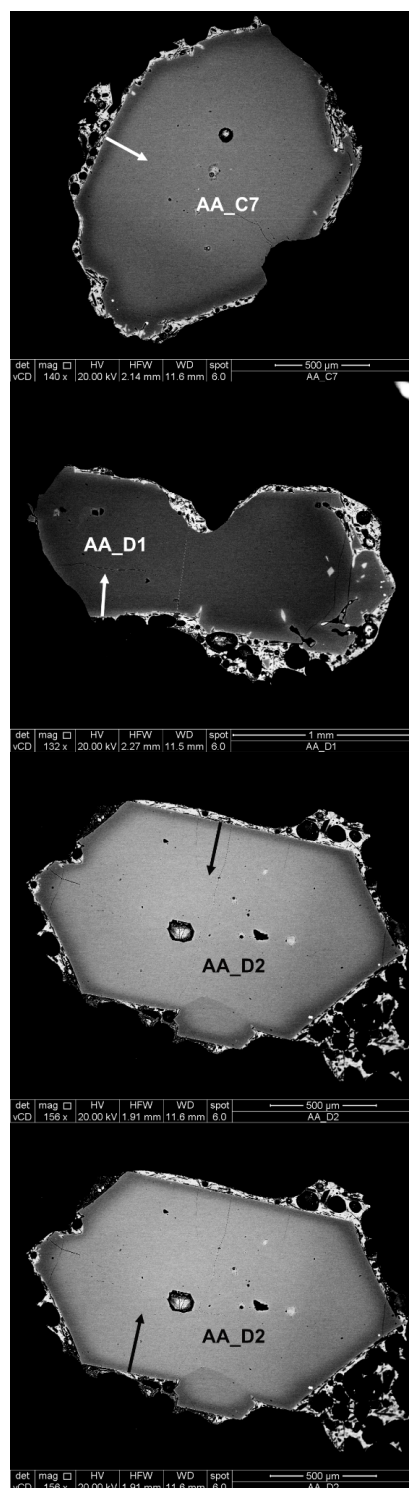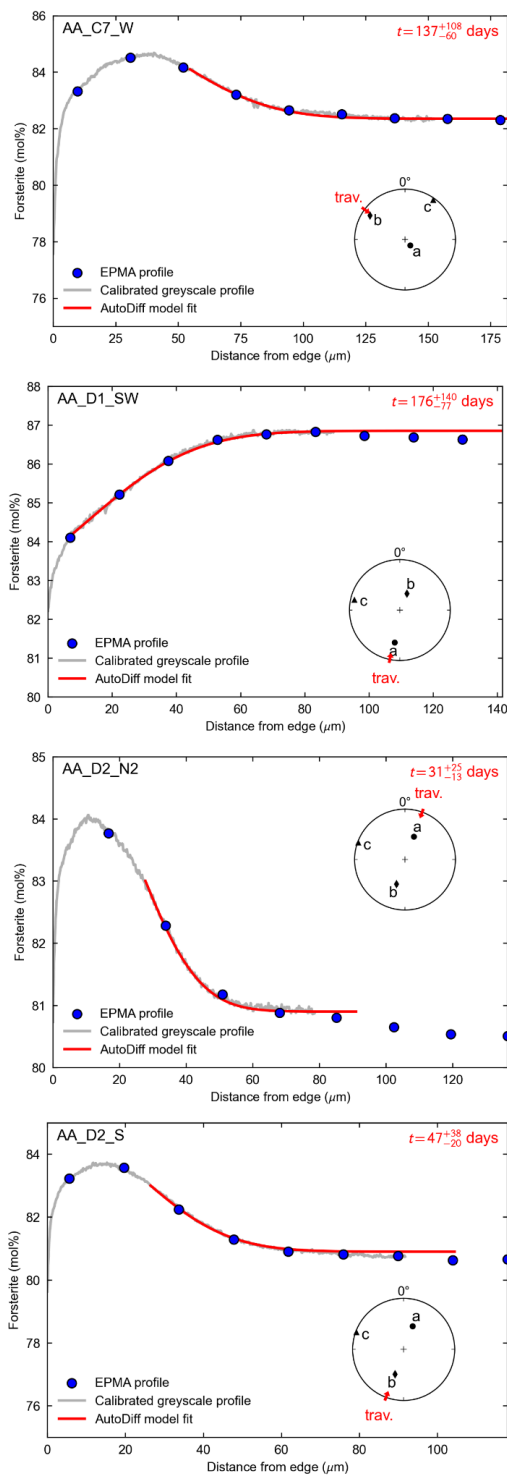

Figure S9.

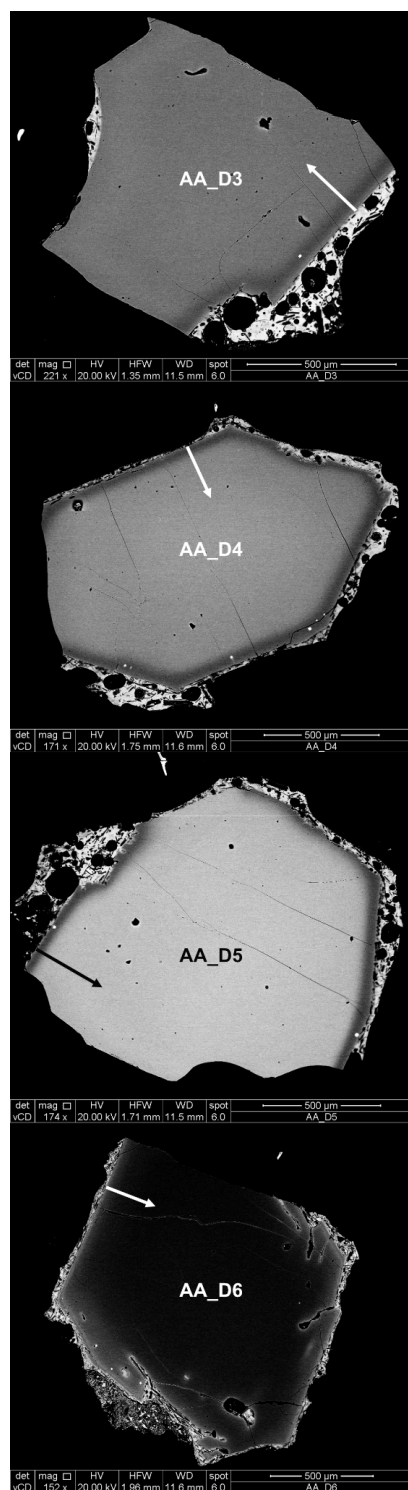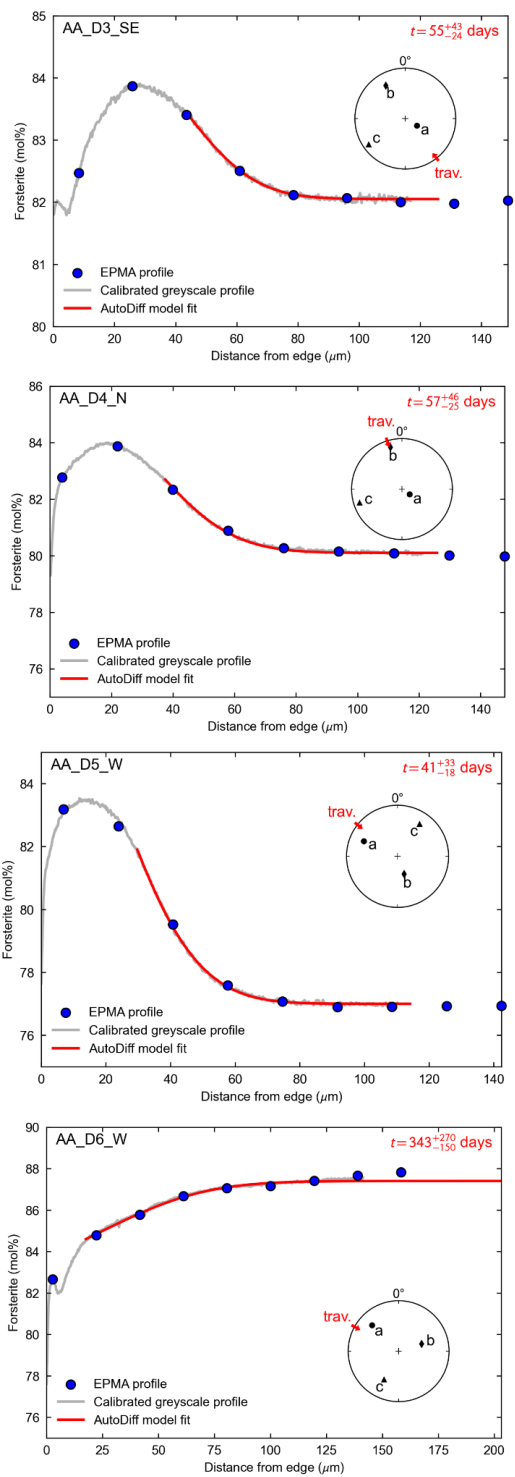

Figure S10.

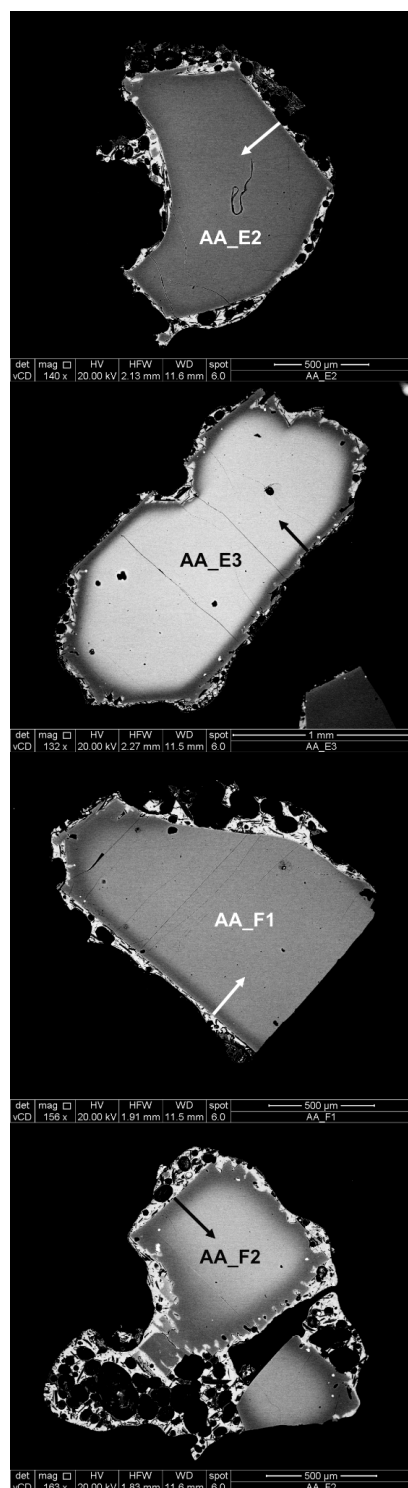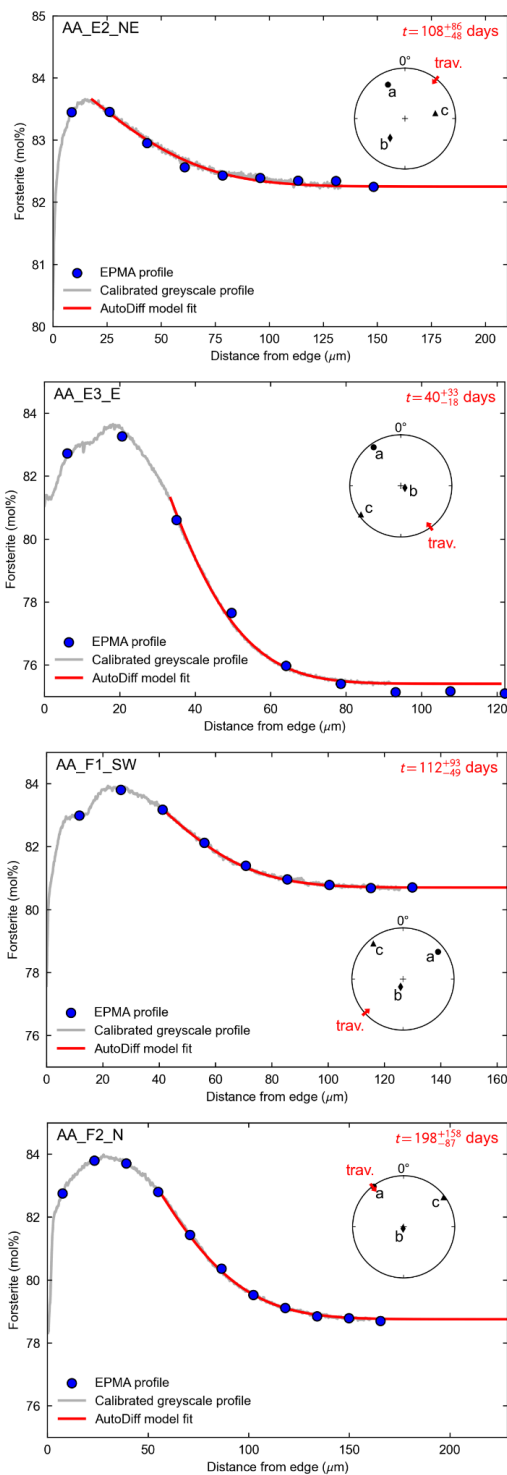

Figure S11.

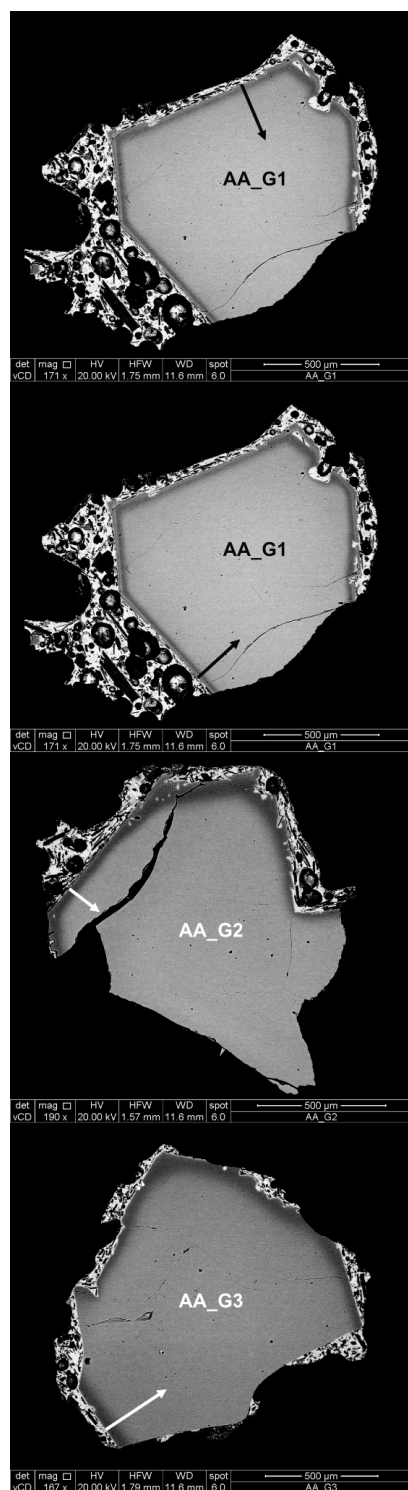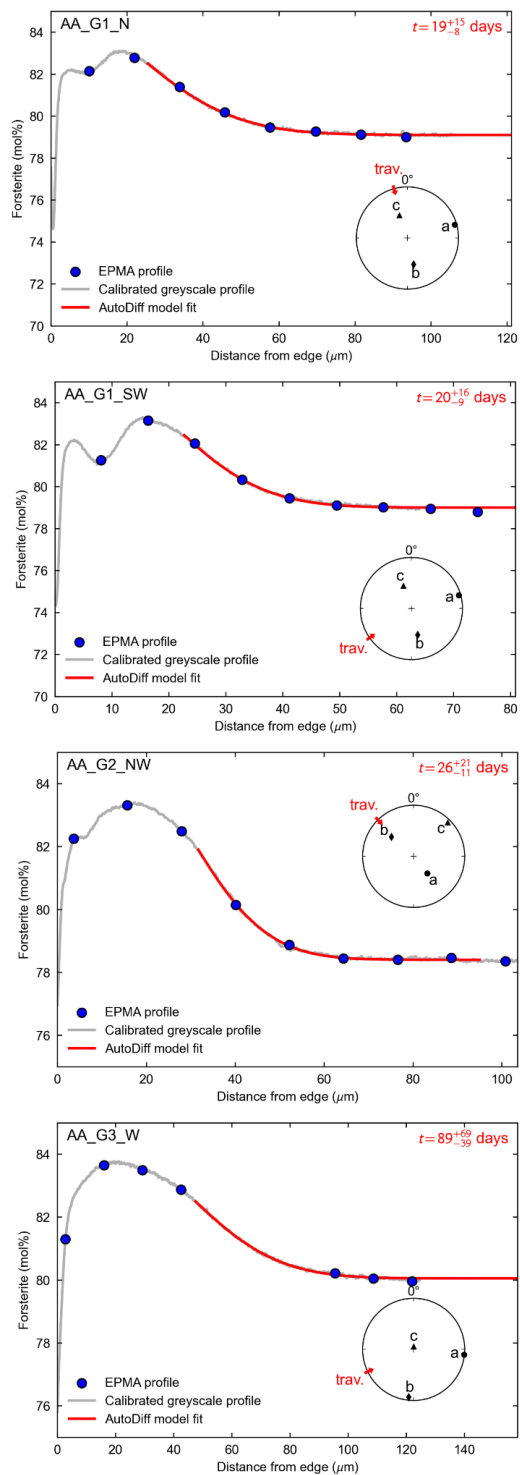

Figure S12.

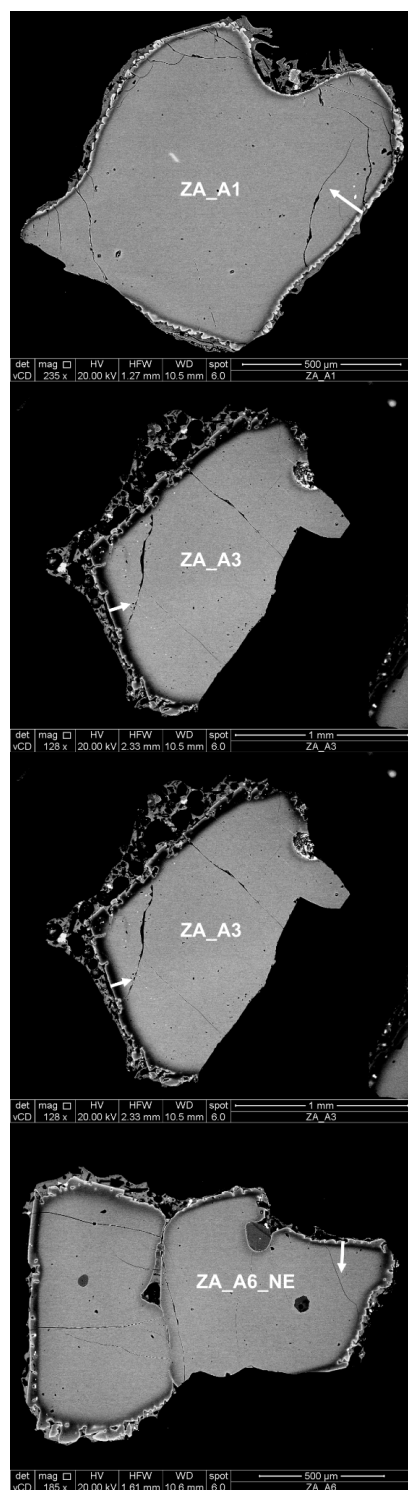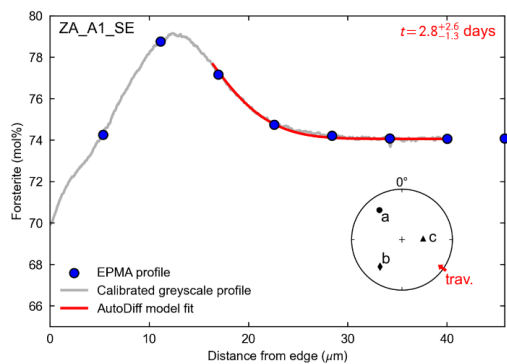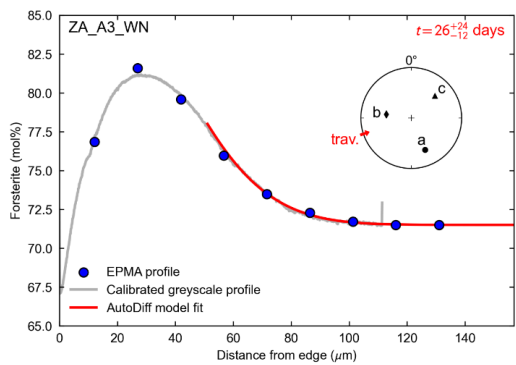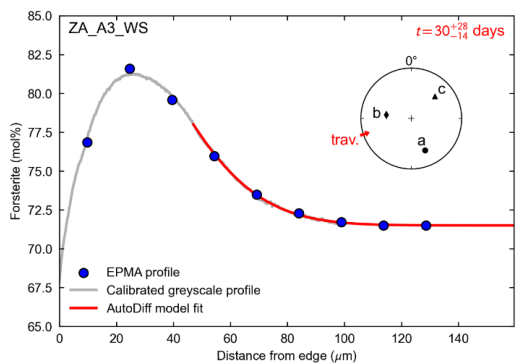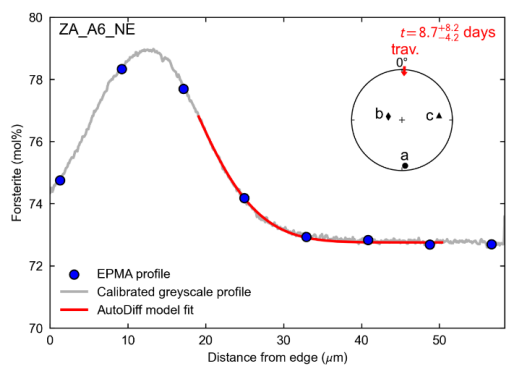

Figure S13.

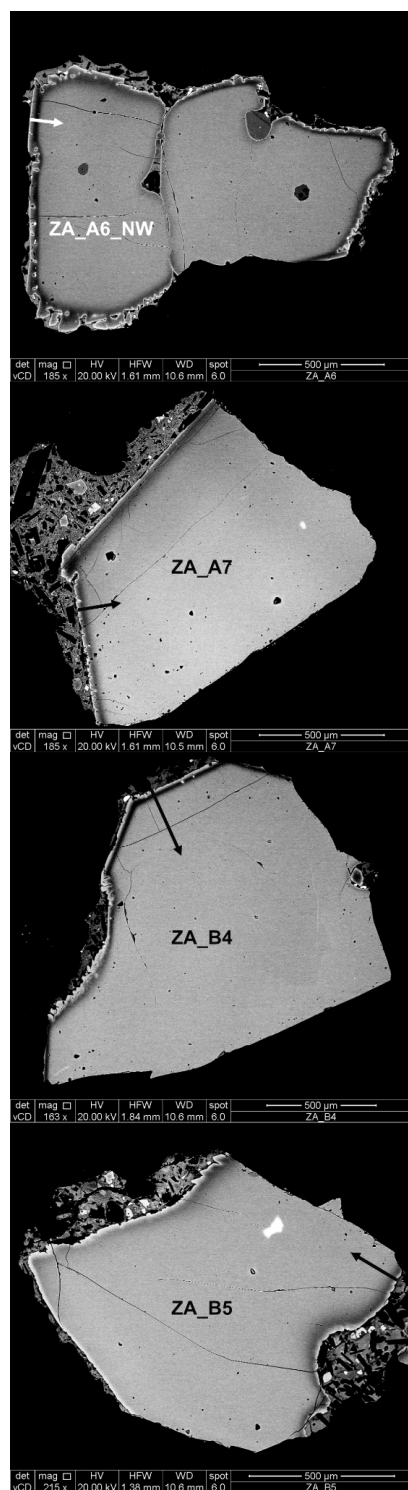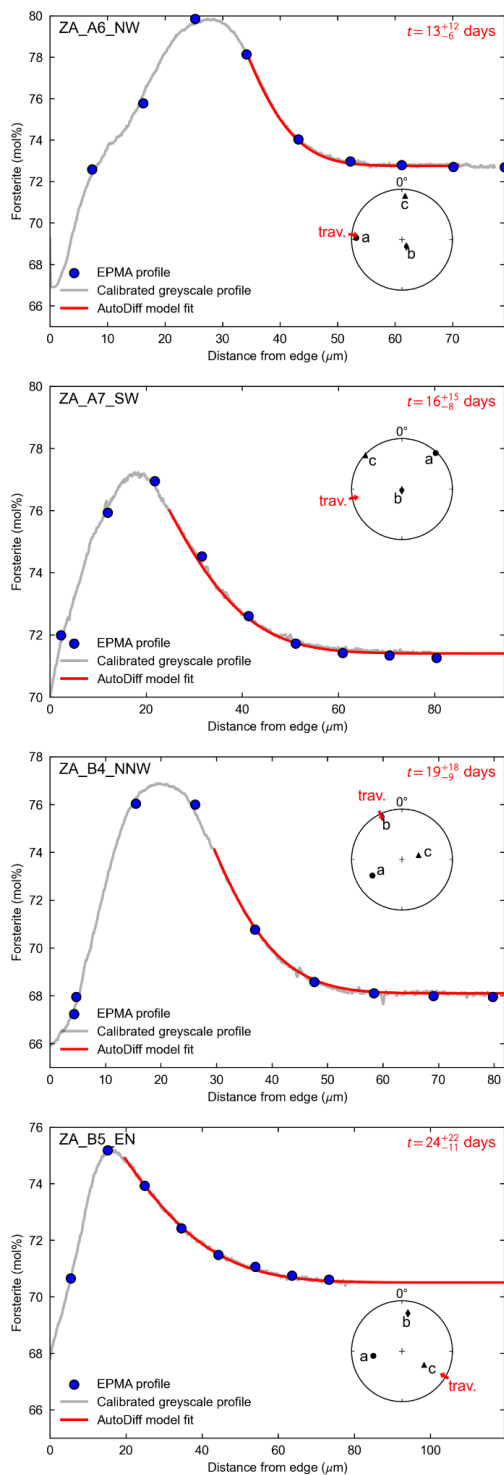

Figure S14.

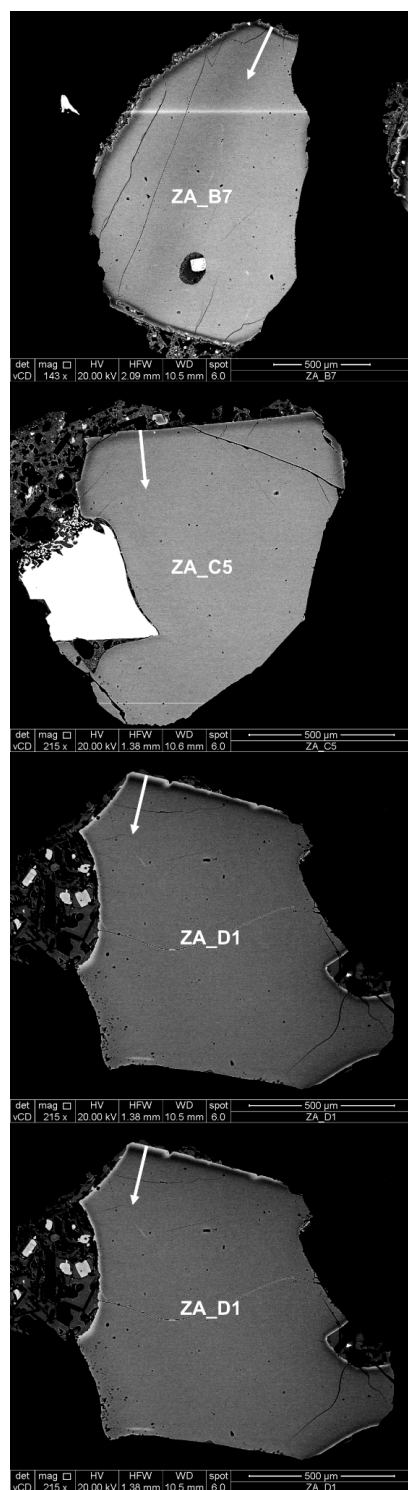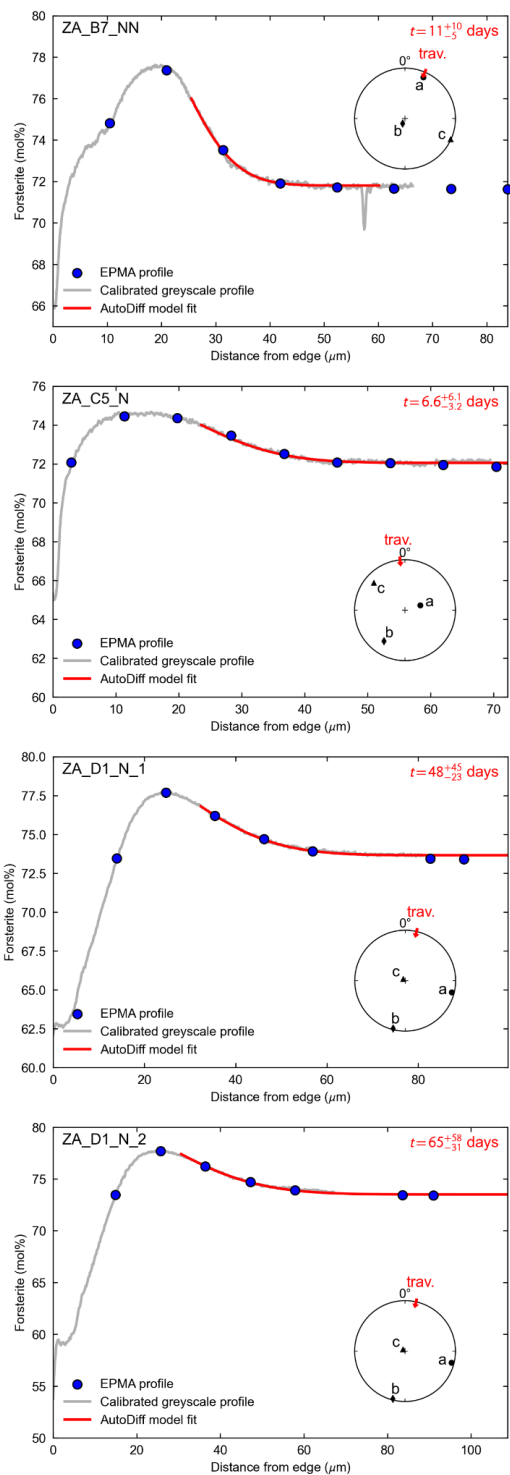

Figure S15.

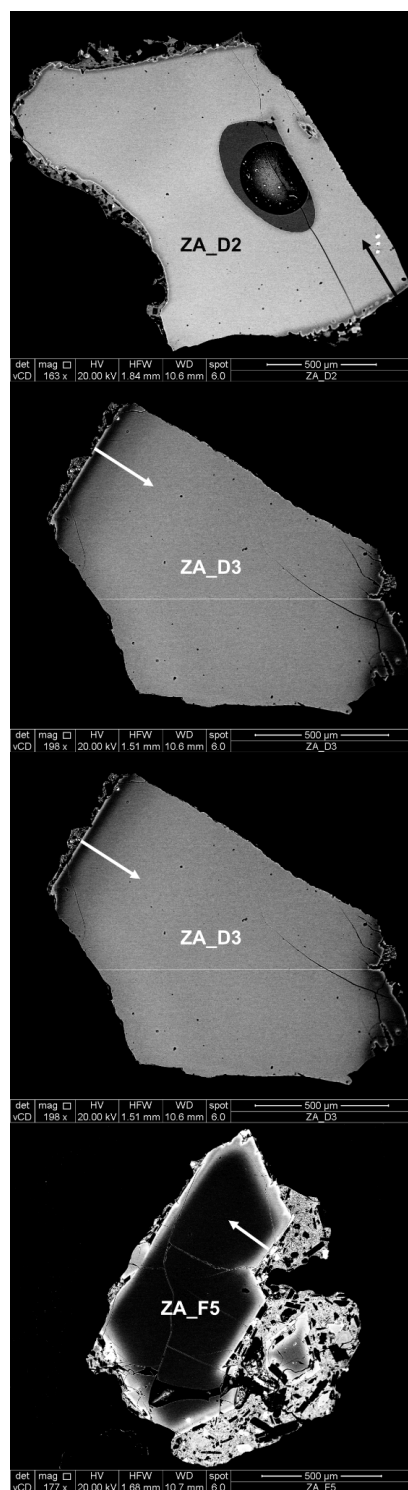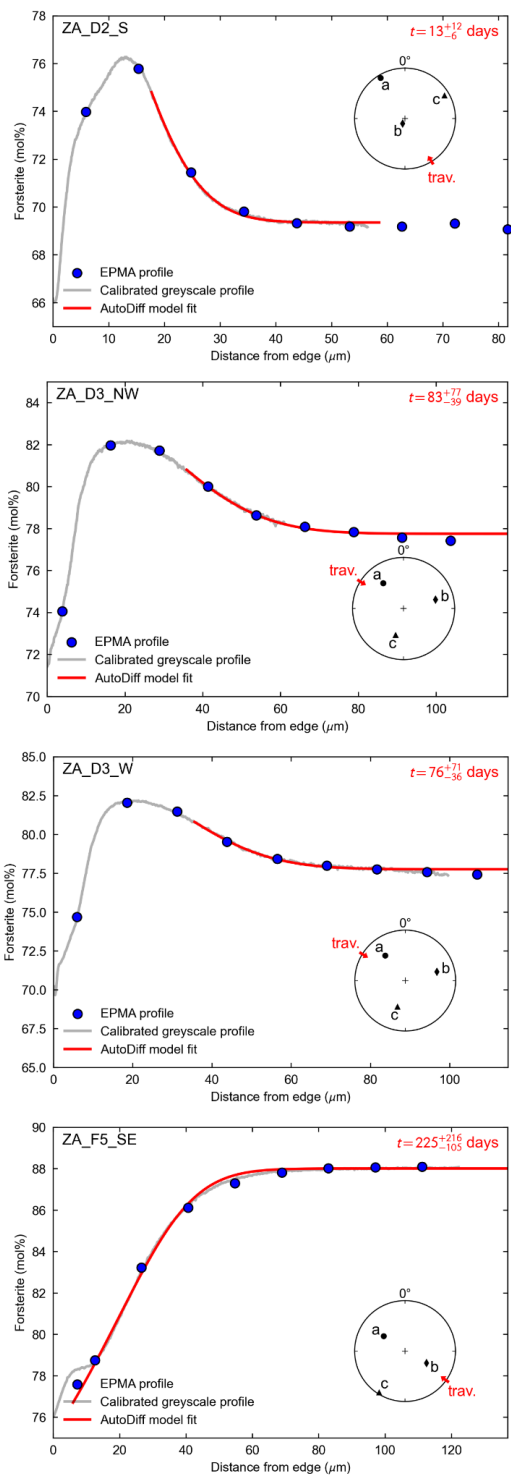

Figure S16.

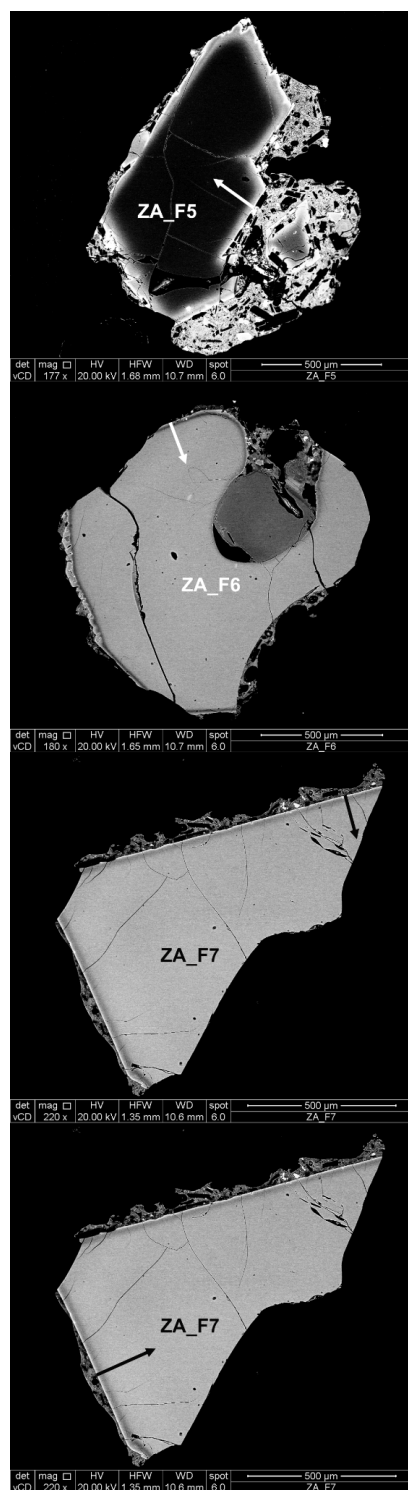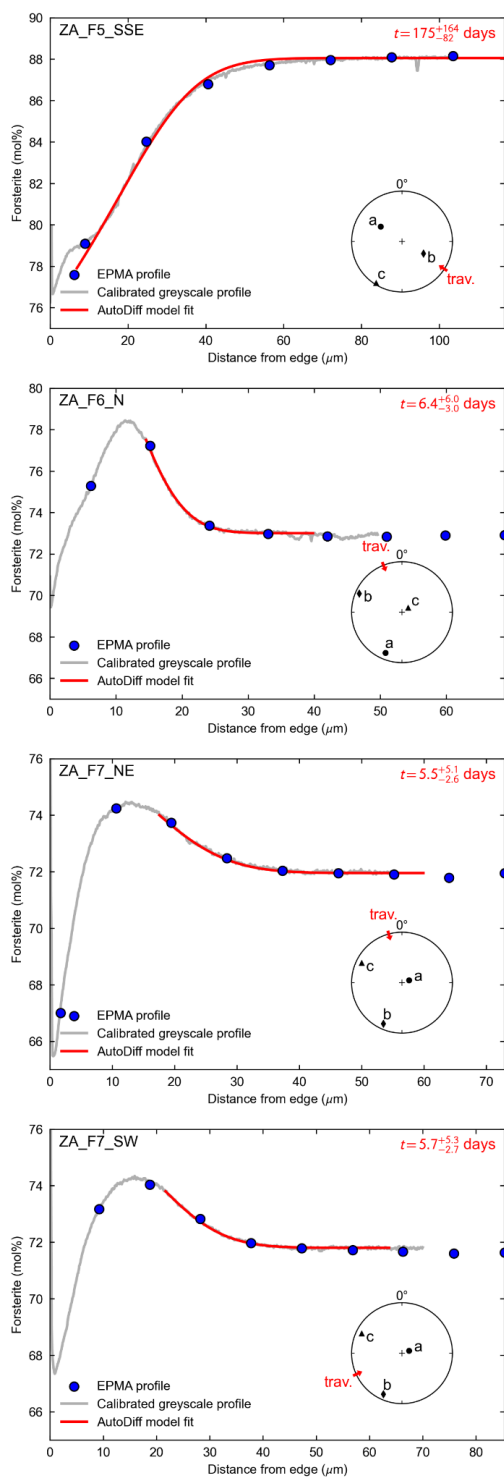

Figure S17.

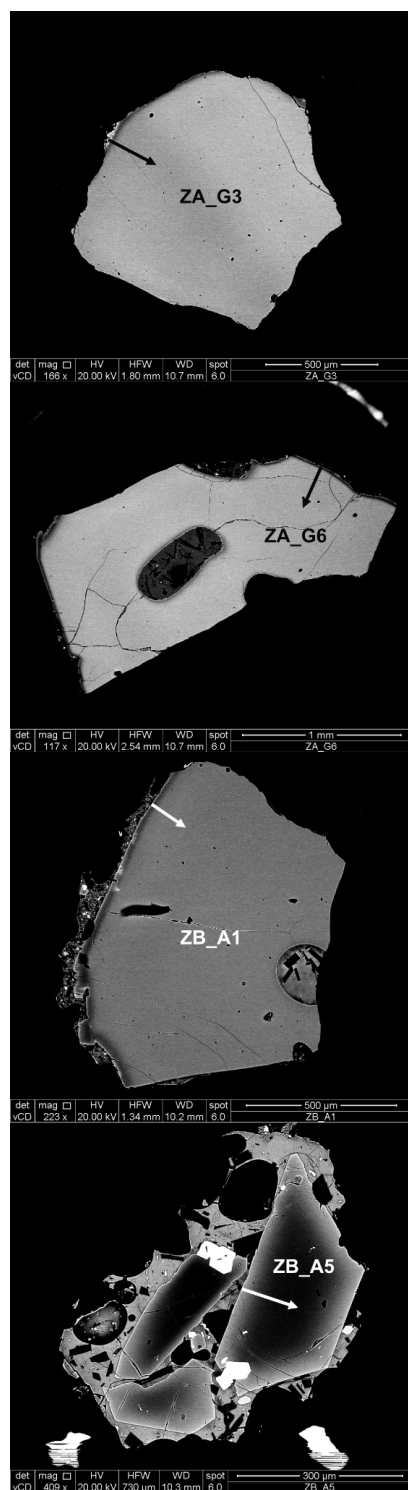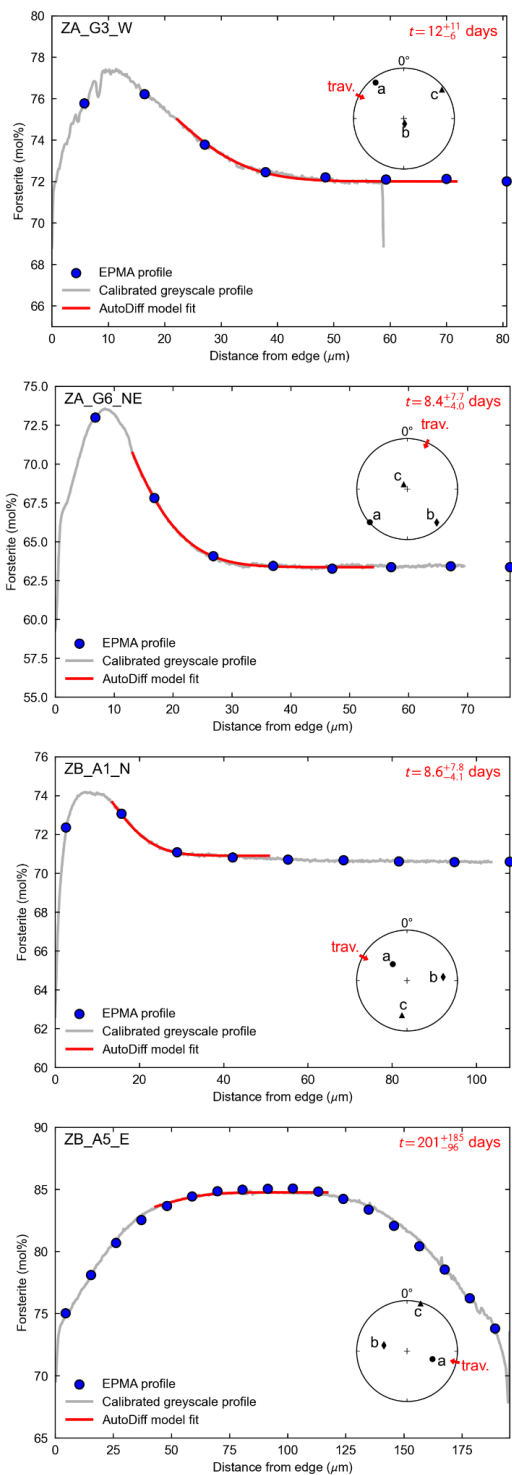

Figure S18.

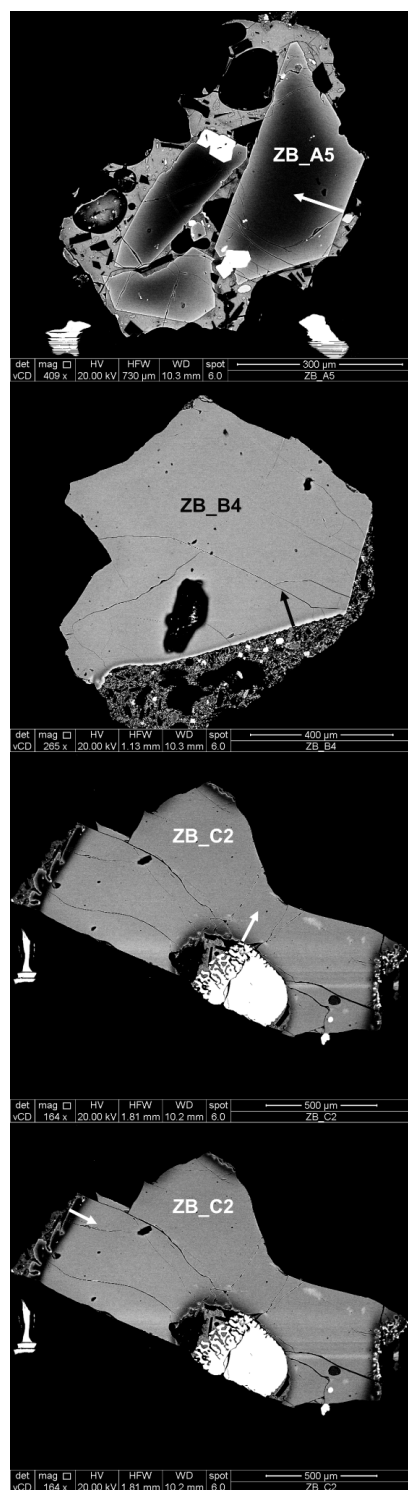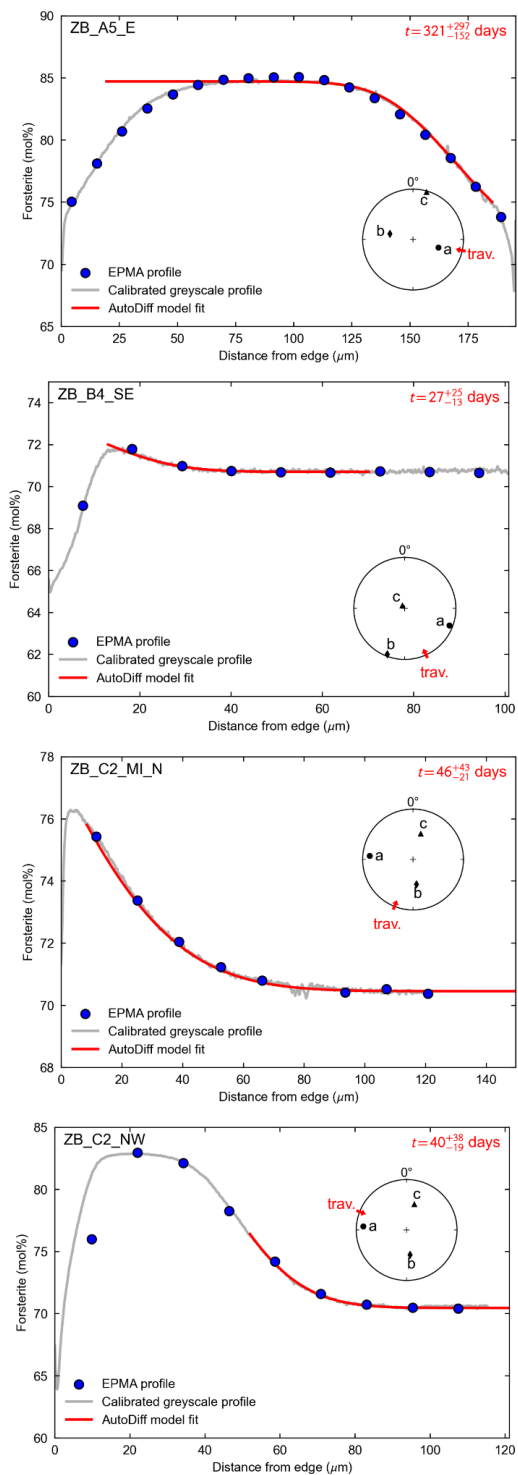

Figure S19.

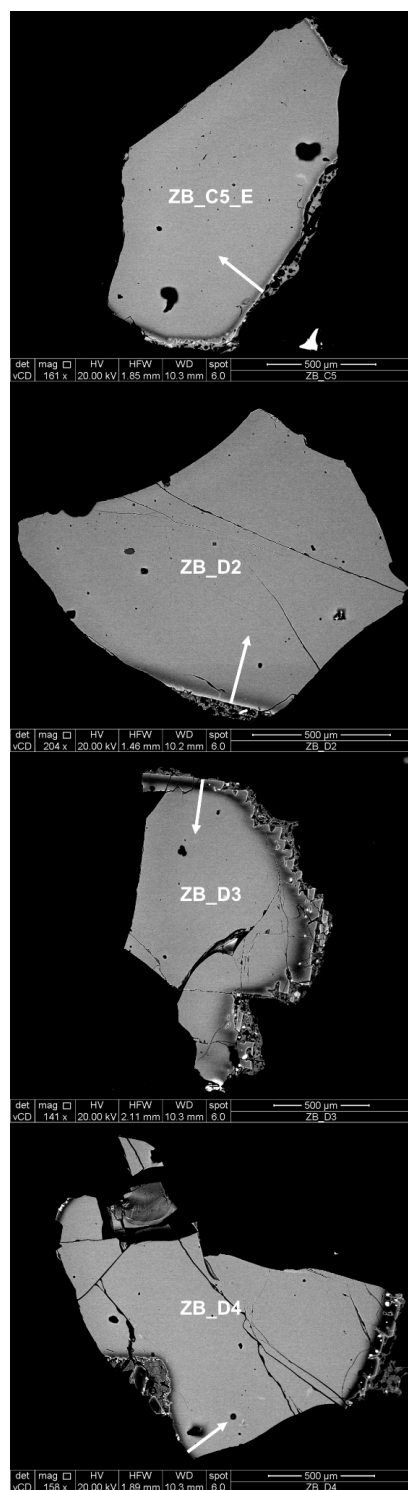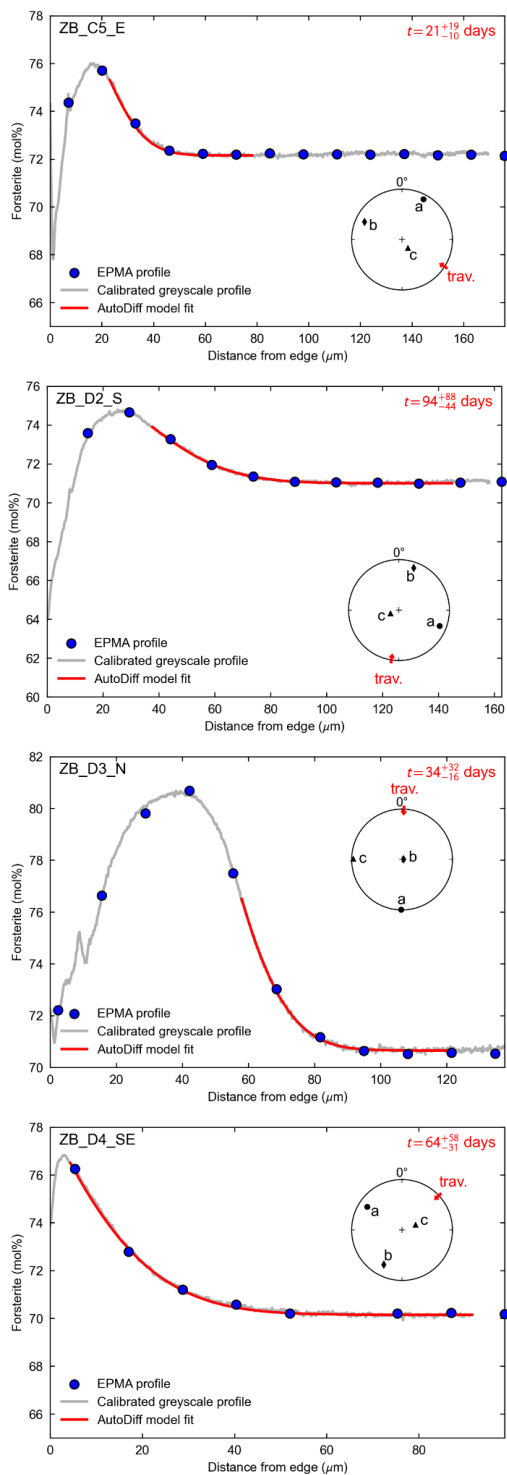

Figure S20.

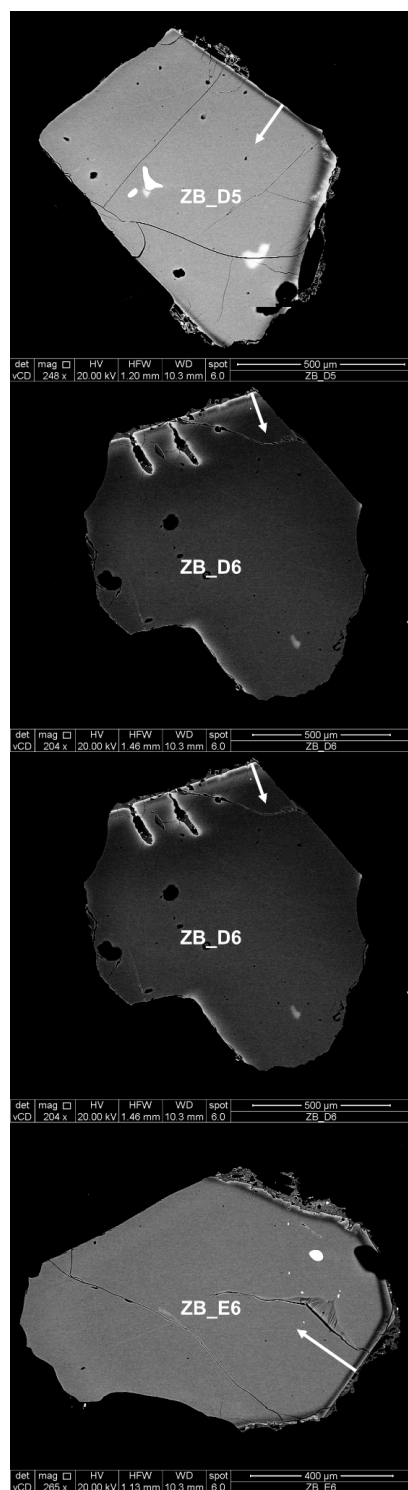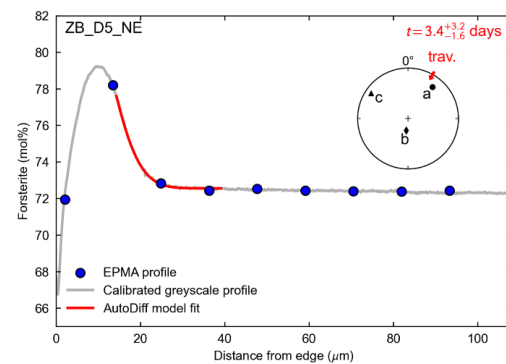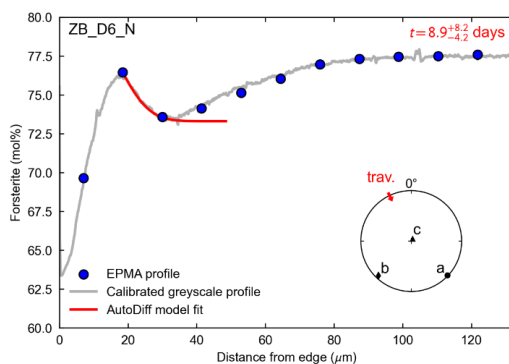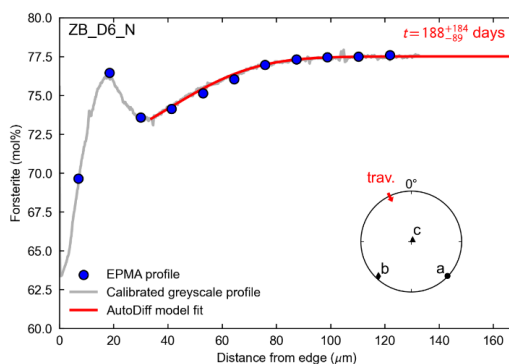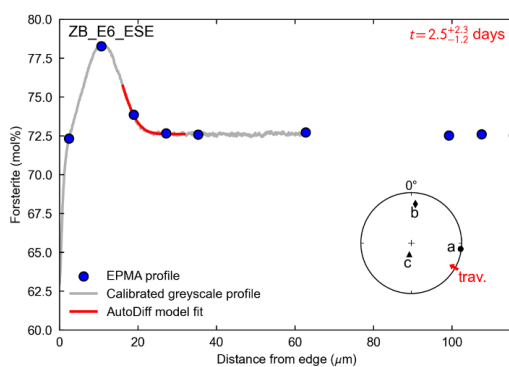

Figure S21.

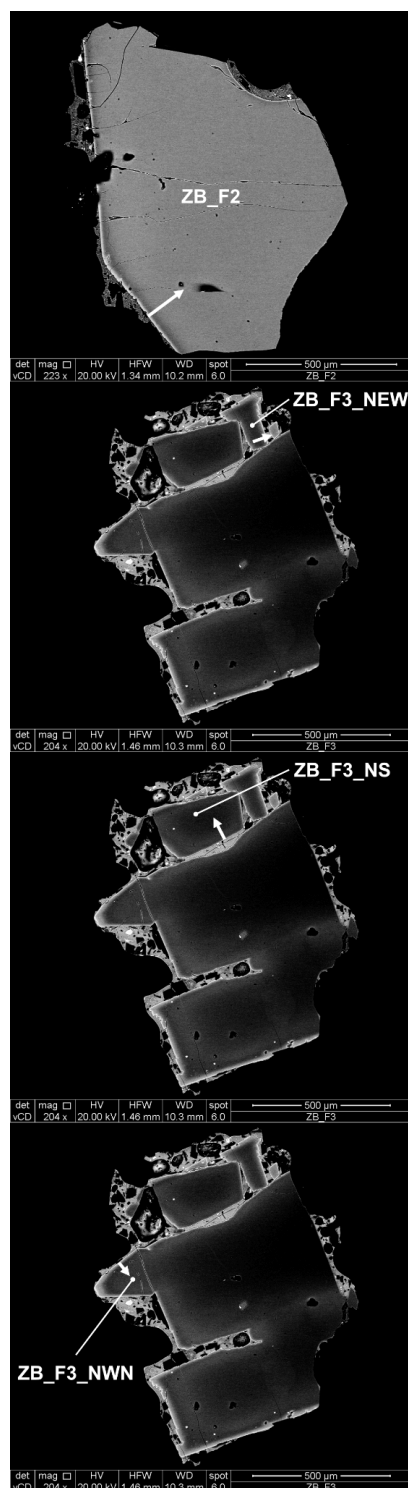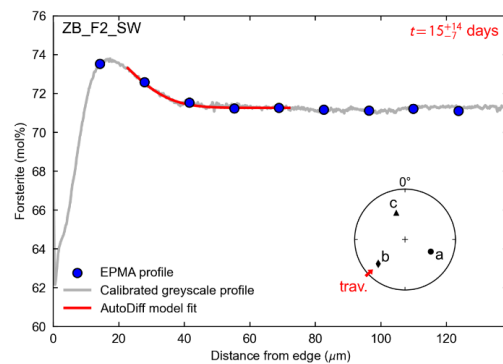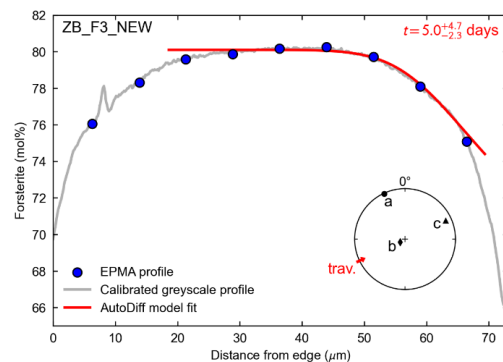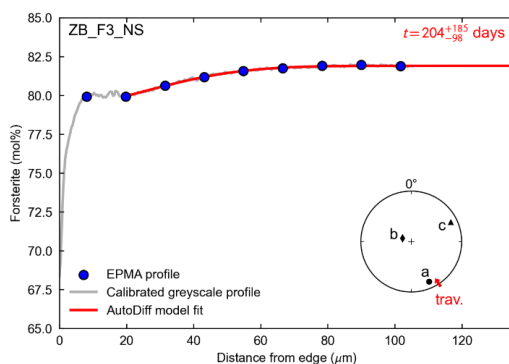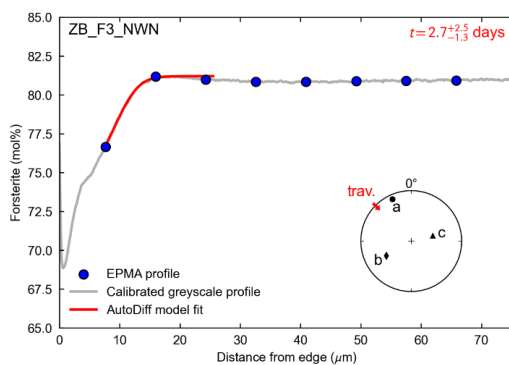

Figure S22.

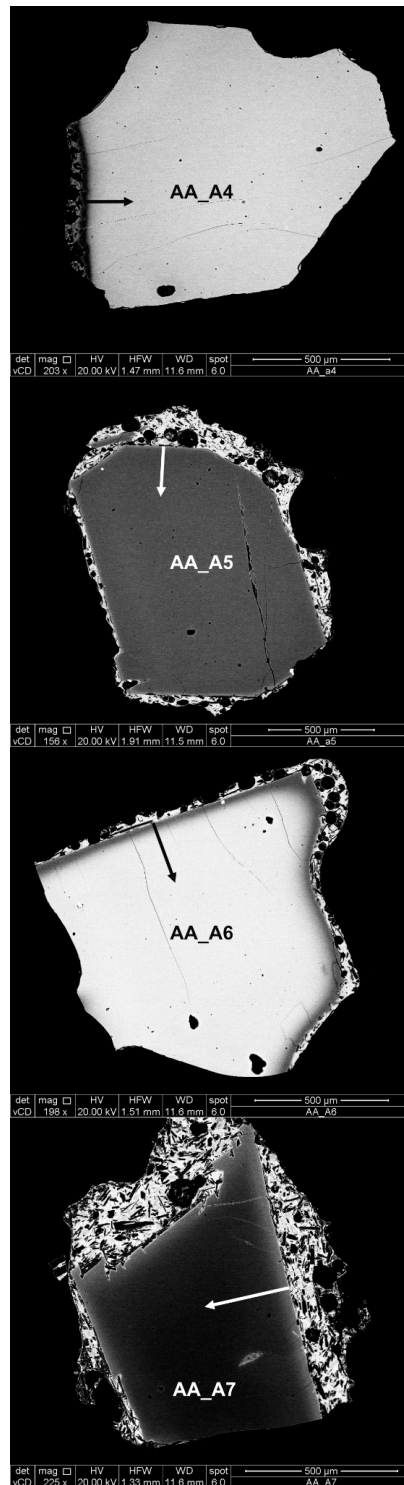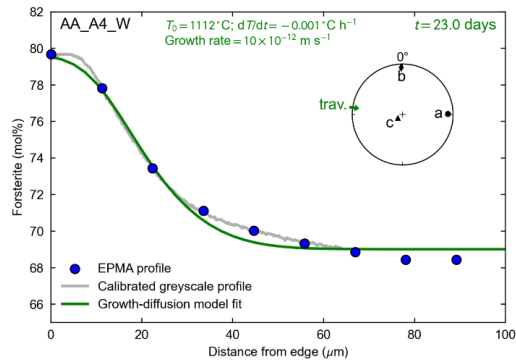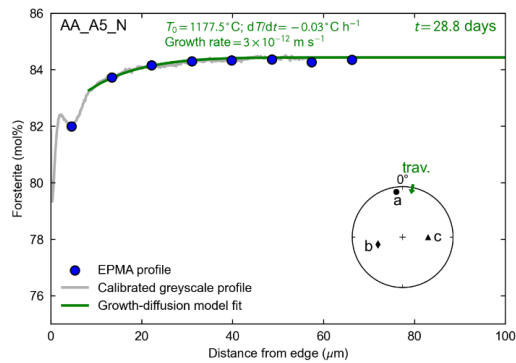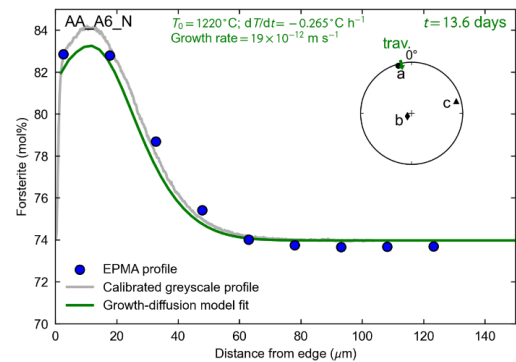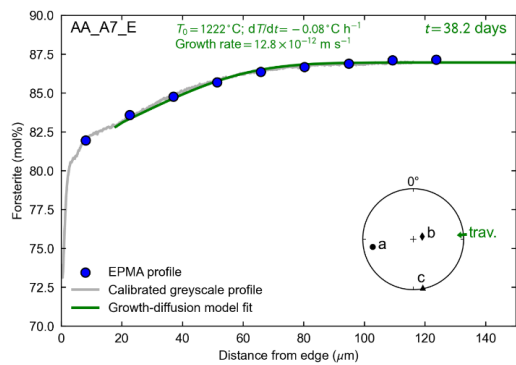

Figures S23–S30: Backscatter electron images showing profile traverses across Main Ethiopian Rift olivines, and plots showing Fo change with traverse distance across profiles. Growth-diffusion model fits are shown as the green line, and variables are shown as the green text. Pole figures showing crystallographic orientation are shown as inset figures.

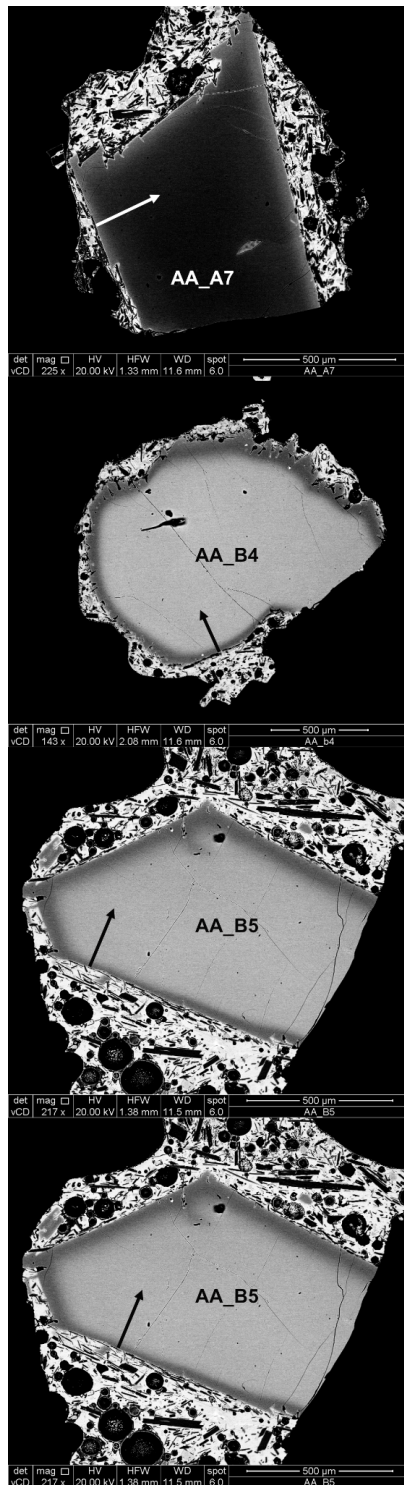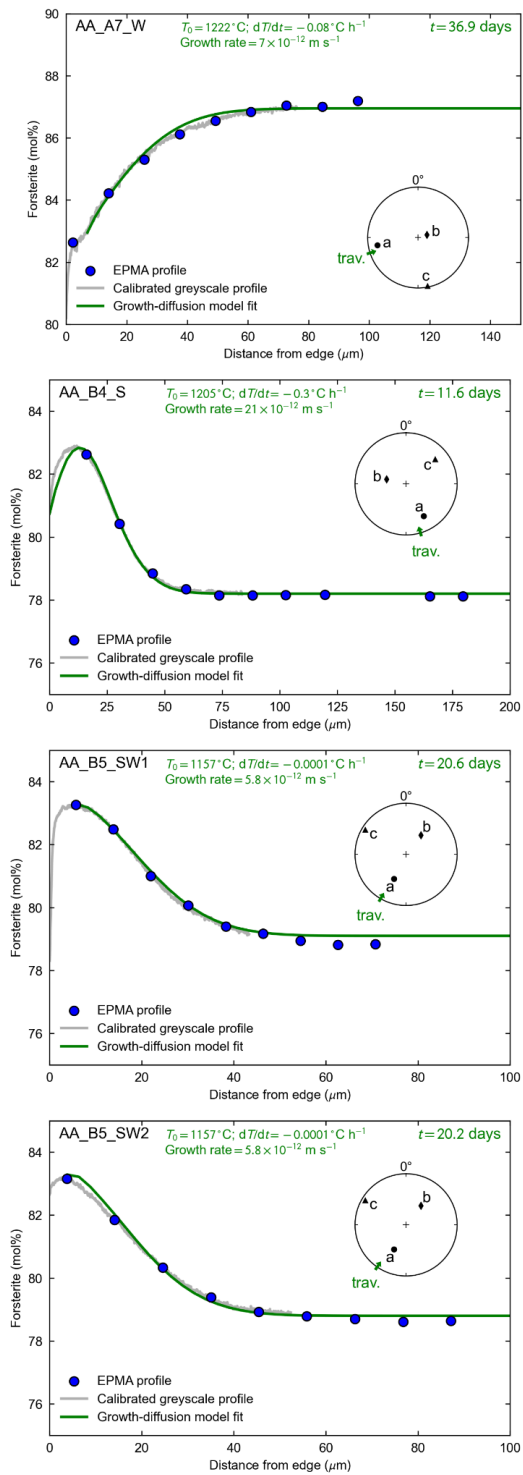

Figure S24.

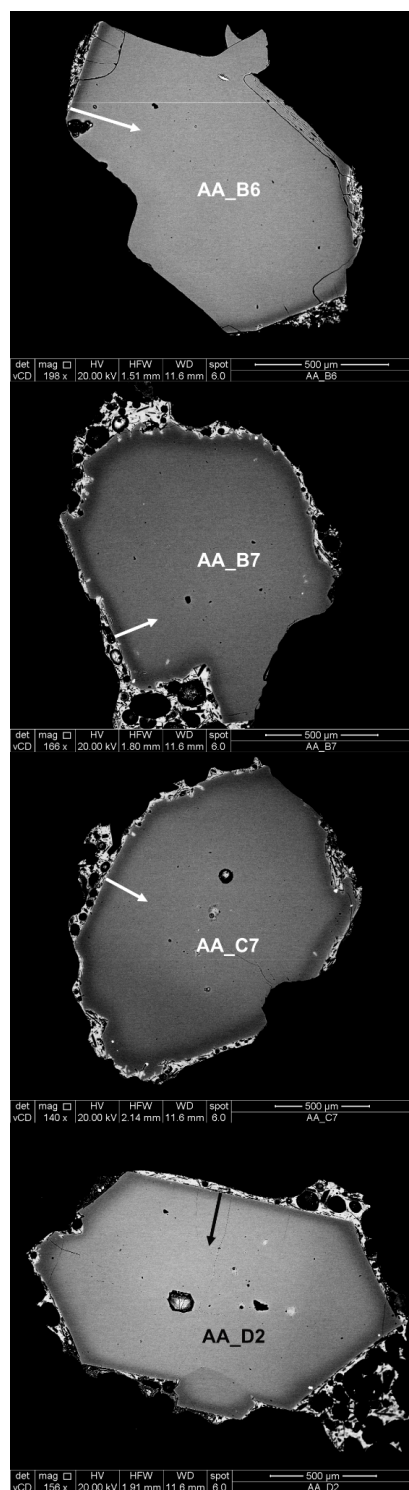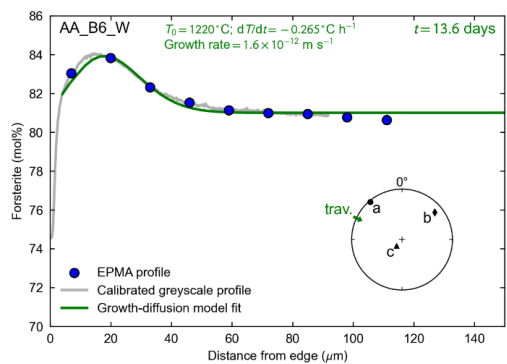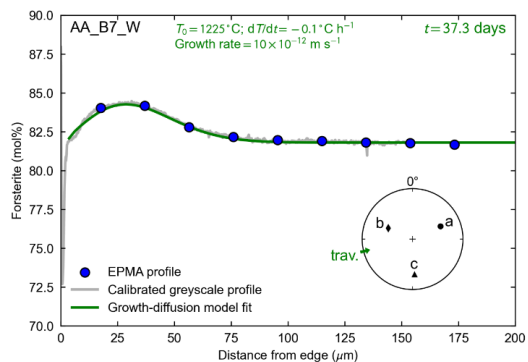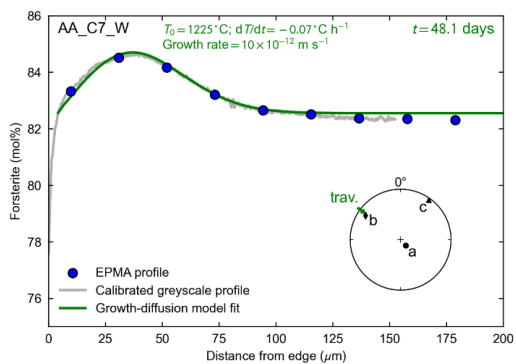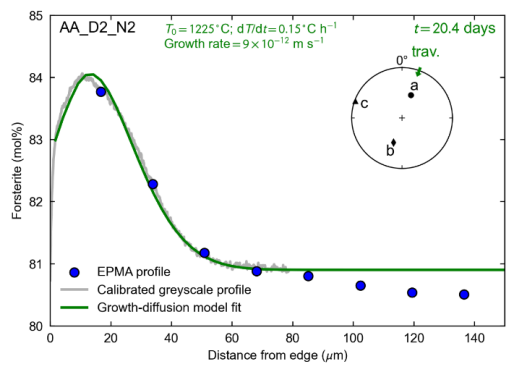

Figure S25.

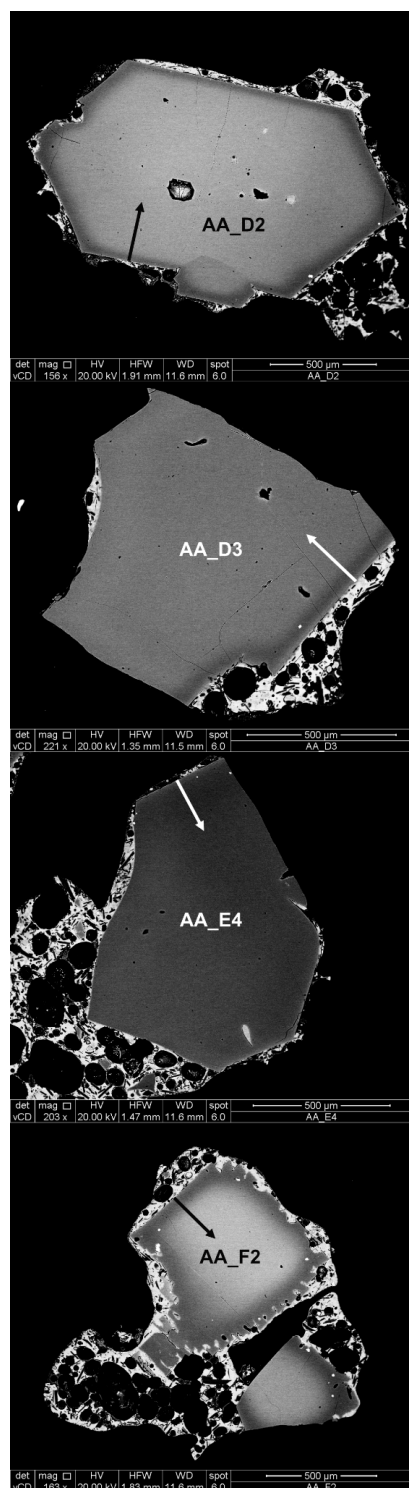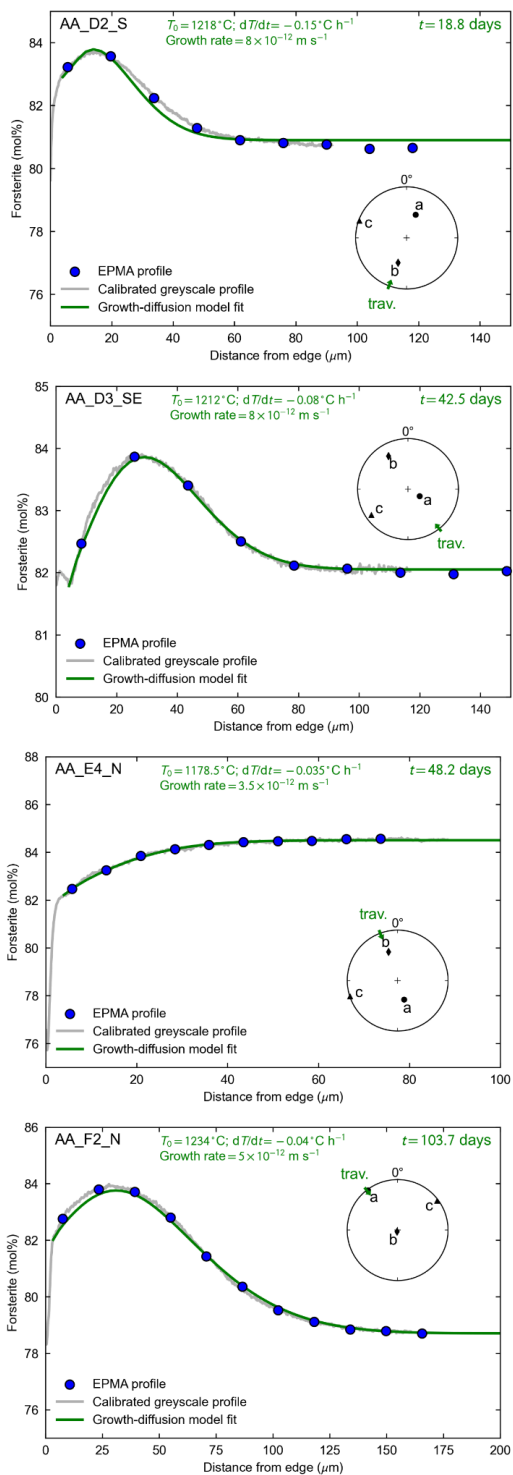

Figure S26.

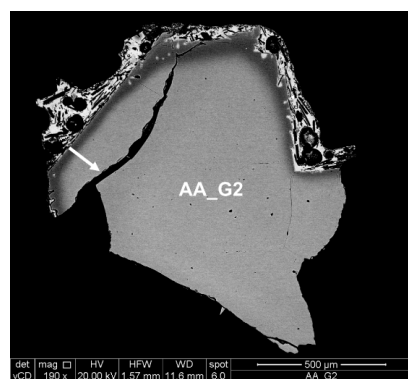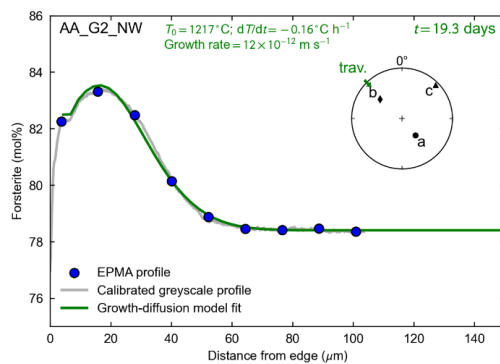

Figure S27.

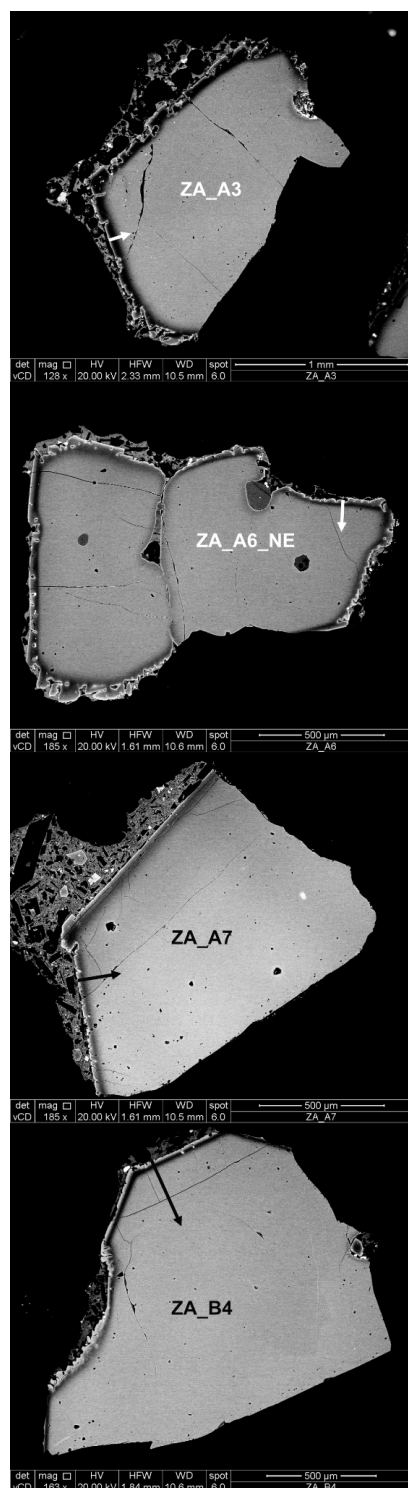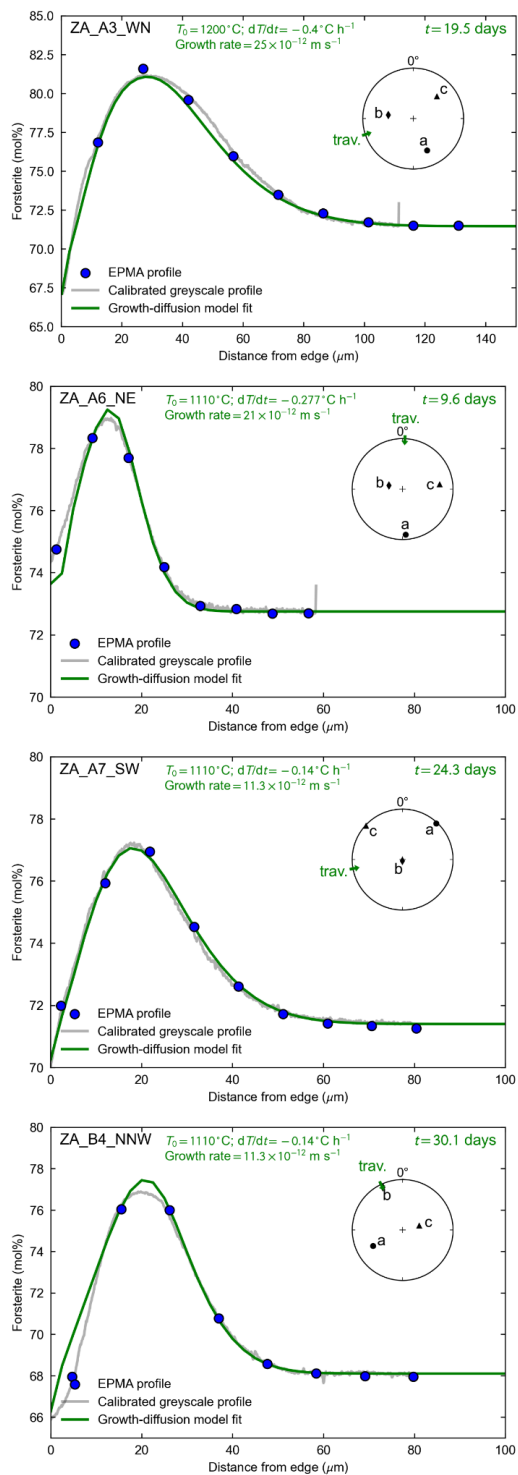

Figure S28.

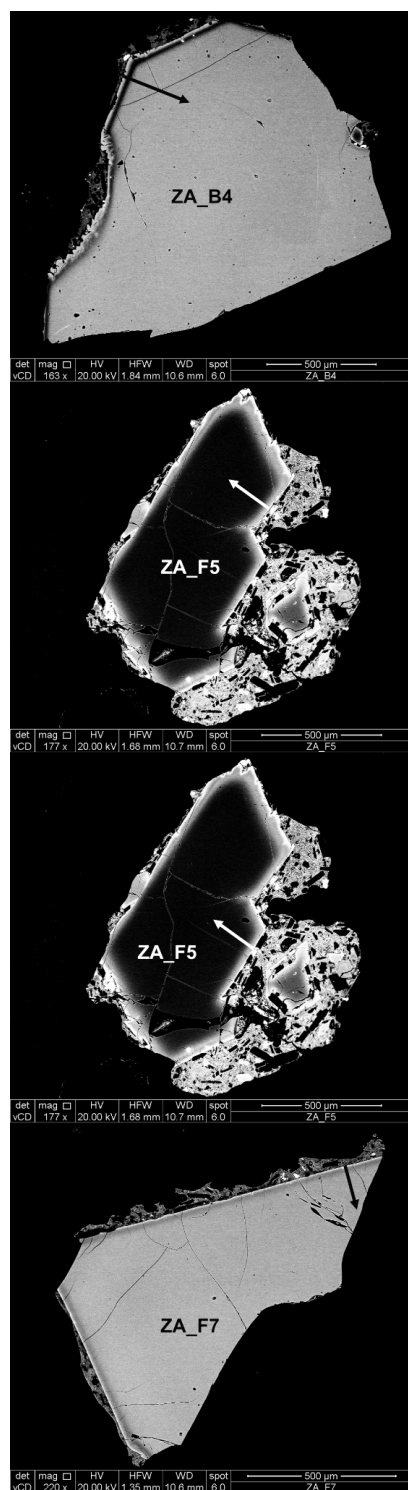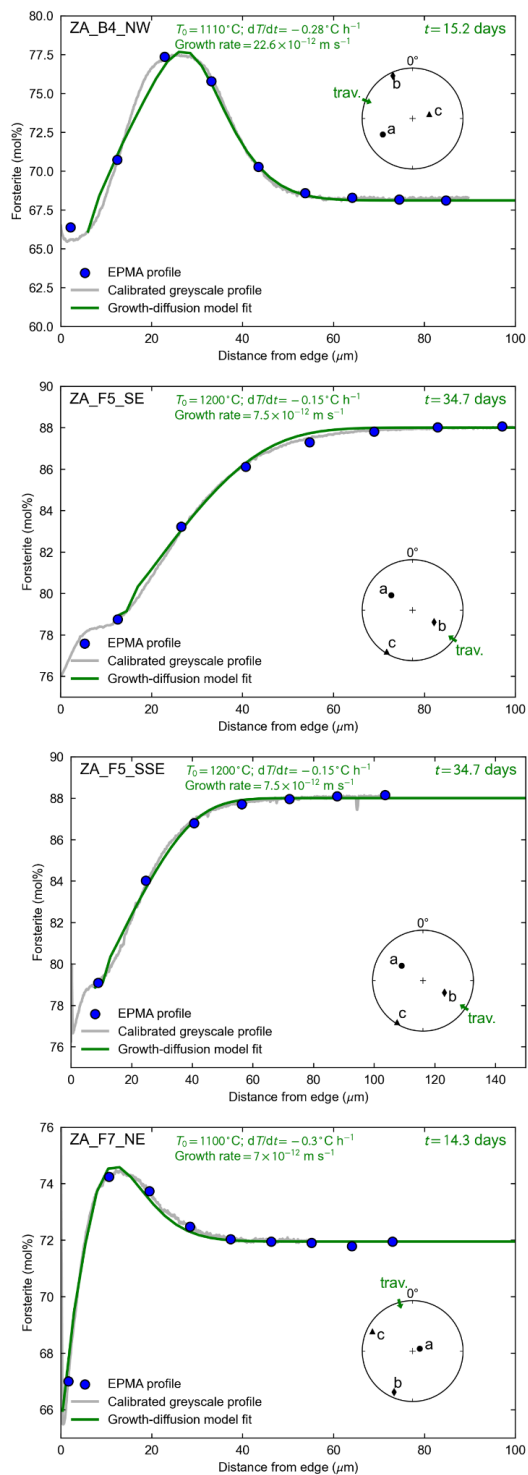

Figure S29.

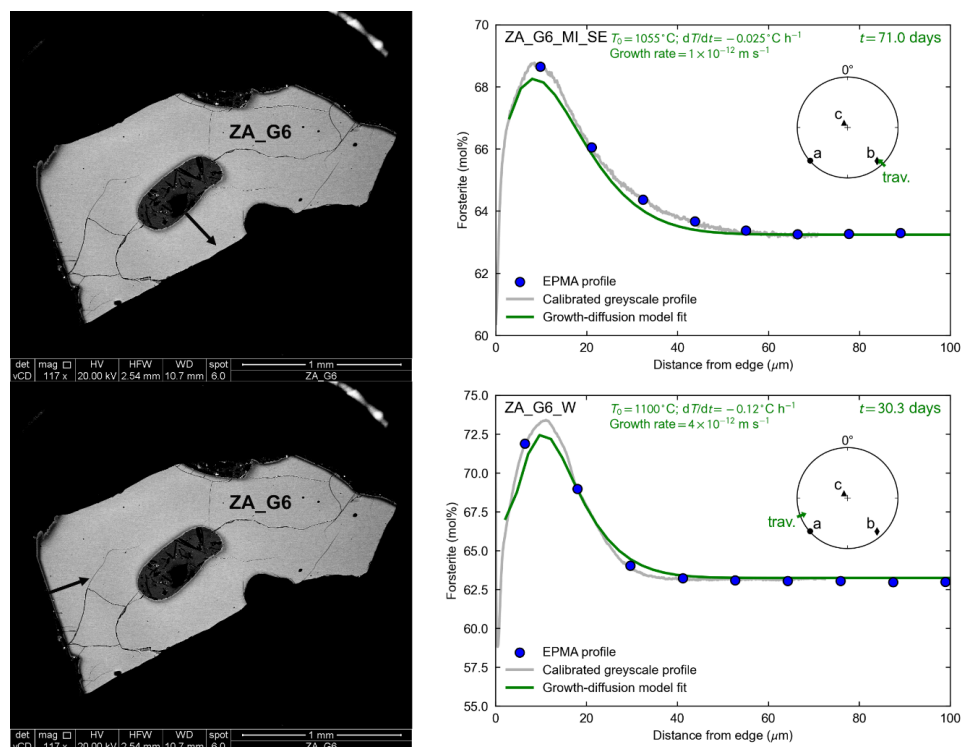

Figure S30.

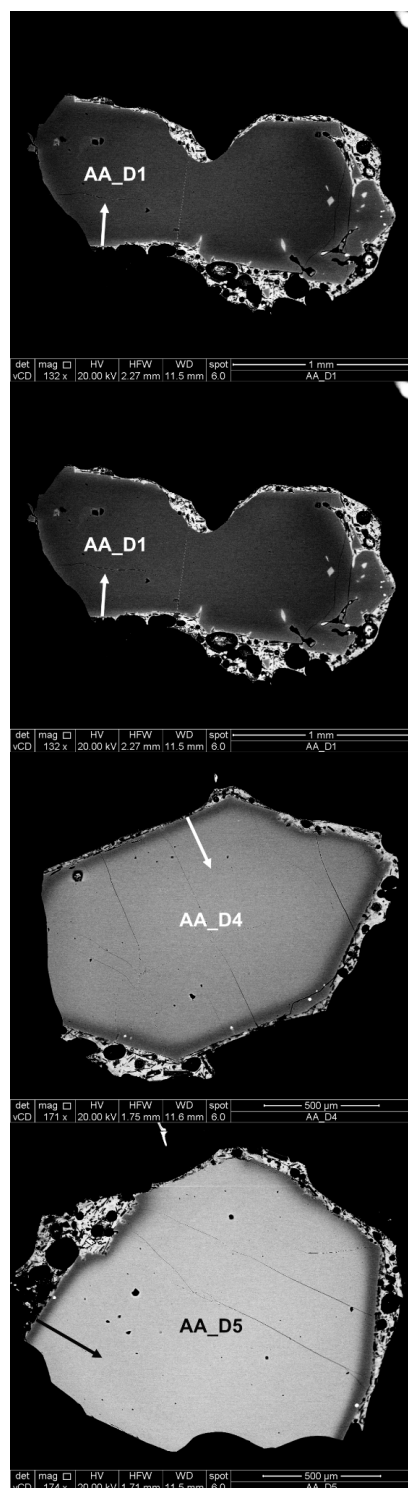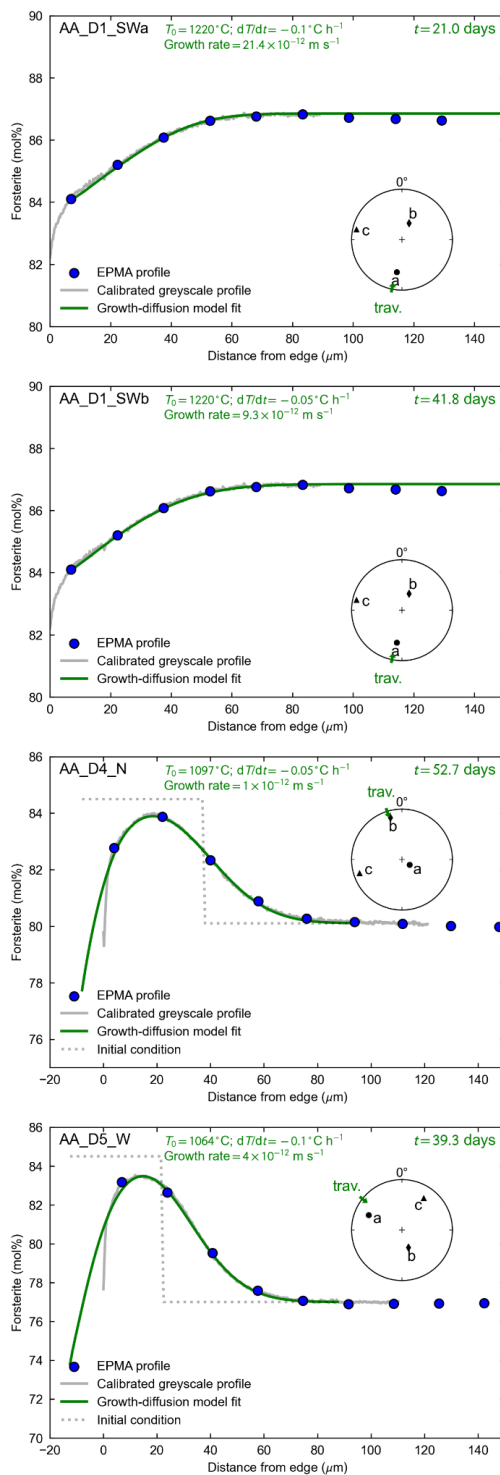

Figure S31: Growth-diffusion models as shown in Figures S23–S30, but for unique cases. The top two figures are two fits to the greyscale profile. However, their input variables are different, resulting in two different timescales. The bottom two figures are cases where a stepped initial profile is assumed, in contrast to the core plateau starting profile in all other cases.

## References for figure captions

1. Gualda, G. A. R., Ghiorso, M. S., Lemons, R. V. & Carley, T. L. Rhyolite-MELTS: a Modified Calibration of MELTS Optimized for Silica-rich, Fluid-bearing Magmatic Systems. *J. Petrol.* **53**, 875–890 (2012).
2. Wong, K. *et al.* Focused Mid-Crustal Magma Intrusion During Continental Break-Up in Ethiopia. *Geophys. Res. Lett.* **50**, e2023GL103257 (2023).
3. Iddon, F. & Edmonds, M. Volatile-Rich Magmas Distributed Through the Upper Crust in the Main Ethiopian Rift. *Geochem. Geophys. Geosystems* **21**, e2019-GC008904 (2020).
4. Rooney, T. O., Furman, T., Yirgu, G. & Ayalew, D. Structure of the Ethiopian lithosphere: Xenolith evidence in the Main Ethiopian Rift. *Geochim. Cosmochim. Acta* **69**, 3889–3910 (2005).
5. Gleeson, M. L. M. *et al.* Constraining magma storage conditions at a restless volcano in the Main Ethiopian Rift using phase equilibria models. *J. Volcanol. Geotherm. Res.* **337**, 44–61 (2017).
